# Supplementary material
Source: MDPI journal article supplement (https://www.mdpi.com/2306-5729/6/8/79)
Supplement: s1 [file s1]

Archive with 3 entries (3 files):
- Figures.pdf
- Table S1 Quarterly Temp data since 1967.xlsx
- Table S2 Summary Stat_v1.xlsx
