# Supplementary material
Source: MDPI journal article supplement (https://www.mdpi.com/2306-5729/6/8/79)
Supplement: s1 [file s1 › Table S1 Quarterly Temp data since 1967.xlsx]

## Sheet: Quarterly Temp
Date	Quarter	County	Basin	Watershed	Site	Temp_C
1967-01-01	Qtr1	New Castle	Piedmont	Red Clay Creek	103011	2.33333
1967-01-01	Qtr1	New Castle	Piedmont	Red Clay Creek	103031	1
1967-04-01	Qtr2	New Castle	Piedmont	Red Clay Creek	103011	16.8333
1967-07-01	Qtr3	New Castle	Piedmont	Red Clay Creek	103011	19
1967-07-01	Qtr3	New Castle	Piedmont	Red Clay Creek	103031	21.25
1967-10-01	Qtr4	New Castle	Piedmont	Red Clay Creek	103011	11
1967-10-01	Qtr4	New Castle	Piedmont	Red Clay Creek	103031	11.5
1968-01-01	Qtr1	New Castle	Piedmont	Red Clay Creek	103011	4.33333
1968-01-01	Qtr1	New Castle	Piedmont	Red Clay Creek	103031	2.5
1968-04-01	Qtr2	New Castle	Piedmont	Red Clay Creek	103011	13.5
1968-04-01	Qtr2	New Castle	Piedmont	Red Clay Creek	103031	14.75
1968-07-01	Qtr3	New Castle	Piedmont	Red Clay Creek	103011	24.3333
1968-07-01	Qtr3	New Castle	Piedmont	Red Clay Creek	103031	23.6667
1968-10-01	Qtr4	New Castle	Piedmont	Red Clay Creek	103011	12.1667
1968-10-01	Qtr4	New Castle	Piedmont	Red Clay Creek	103031	12.6667
1969-01-01	Qtr1	New Castle	Piedmont	Red Clay Creek	103011	4.33333
1969-01-01	Qtr1	New Castle	Piedmont	Red Clay Creek	103031	2
1969-04-01	Qtr2	New Castle	Piedmont	Red Clay Creek	103011	16.3333
1969-04-01	Qtr2	New Castle	Piedmont	Red Clay Creek	103031	16.6667
1969-07-01	Qtr3	New Castle	Piedmont	Red Clay Creek	103011	23
1969-07-01	Qtr3	New Castle	Piedmont	Red Clay Creek	103031	22.3333
1969-10-01	Qtr4	New Castle	Piedmont	Red Clay Creek	103011	13.8333
1969-10-01	Qtr4	New Castle	Piedmont	Red Clay Creek	103031	13.8333
1970-01-01	Qtr1	Sussex	Delaware Bay	Broadkill River	303021	7.6667
1970-01-01	Qtr1	Sussex	Inland Bays	Lewes-Rehoboth Canal	305011	5
1970-01-01	Qtr1	Sussex	Chesapeake Bay	Broad Creek	307031	4
1970-01-01	Qtr1	Sussex	Inland Bays	Rehoboth Bay	308031	5
1970-01-01	Qtr1	Sussex	Inland Bays	Little Assawoman Bay	310011	2.5
1970-01-01	Qtr1	New Castle	Piedmont	Red Clay Creek	103011	3.66667
1970-01-01	Qtr1	New Castle	Piedmont	Red Clay Creek	103031	3.66667
1970-01-01	Qtr1	New Castle	Piedmont	White Clay Creek	105031	4.25
1970-01-01	Qtr1	New Castle	Piedmont	Christina River	106021	2.5
1970-01-01	Qtr1	New Castle	Delaware Bay	Red Lion Creek	107011	5
1970-01-01	Qtr1	New Castle	Delaware Bay	Red Lion Creek	107031	6
1970-01-01	Qtr1	New Castle	Chesapeake Bay	Chesapeake and Delaware Canal	108021	4
1970-01-01	Qtr1	New Castle	Delaware Bay	Appoquinimink River	109041	6
1970-01-01	Qtr1	New Castle	Delaware Bay	Appoquinimink River	109071	8
1970-01-01	Qtr1	New Castle	Delaware Bay	Blackbird Creek	110041	6
1970-04-01	Qtr2	Sussex	Delaware Bay	Broadkill River	303061	18.25
1970-04-01	Qtr2	Sussex	Inland Bays	Lewes-Rehoboth Canal	305011	17.6667
1970-04-01	Qtr2	Sussex	Inland Bays	Lewes-Rehoboth Canal	305041	16
1970-04-01	Qtr2	Sussex	Inland Bays	Rehoboth Bay	306091	19
1970-04-01	Qtr2	Sussex	Inland Bays	Indian River Bay	306111	18
1970-04-01	Qtr2	Sussex	Inland Bays	Indian River Bay	306121	18
1970-04-01	Qtr2	Sussex	Inland Bays	Indian River	306181	21.75
1970-04-01	Qtr2	Sussex	Chesapeake Bay	Broad Creek	307031	19.5
1970-04-01	Qtr2	Sussex	Inland Bays	Rehoboth Bay	308031	14
1970-04-01	Qtr2	Sussex	Inland Bays	Little Assawoman Bay	310011	13
1970-04-01	Qtr2	Sussex	Inland Bays	Buntings Branch	311041	20
1970-04-01	Qtr2	New Castle	Piedmont	Red Clay Creek	103011	15.1667
1970-04-01	Qtr2	New Castle	Piedmont	Red Clay Creek	103031	14.6667
1970-04-01	Qtr2	New Castle	Piedmont	White Clay Creek	105031	12.5
1970-04-01	Qtr2	New Castle	Piedmont	Christina River	106021	16
1970-04-01	Qtr2	New Castle	Chesapeake Bay	Chesapeake and Delaware Canal	108021	16.8333
1970-07-01	Qtr3	Sussex	Delaware Bay	Broadkill River	303061	25
1970-07-01	Qtr3	Sussex	Inland Bays	Lewes-Rehoboth Canal	305011	24.6667
1970-07-01	Qtr3	Sussex	Inland Bays	Lewes-Rehoboth Canal	305041	24
1970-07-01	Qtr3	Sussex	Inland Bays	Rehoboth Bay	306091	25
1970-07-01	Qtr3	Sussex	Inland Bays	Indian River Bay	306111	22.5
1970-07-01	Qtr3	Sussex	Inland Bays	Indian River Bay	306121	23.3333
1970-07-01	Qtr3	Sussex	Inland Bays	Indian River	306181	26
1970-07-01	Qtr3	Sussex	Chesapeake Bay	Broad Creek	307031	20
1970-07-01	Qtr3	Sussex	Inland Bays	Little Assawoman Bay	310011	24.5
1970-07-01	Qtr3	Sussex	Inland Bays	Buntings Branch	311041	21
1970-07-01	Qtr3	New Castle	Piedmont	Red Clay Creek	103011	23.6667
1970-07-01	Qtr3	New Castle	Piedmont	Red Clay Creek	103031	23.1667
1970-07-01	Qtr3	New Castle	Piedmont	White Clay Creek	105031	19.8333
1970-07-01	Qtr3	New Castle	Piedmont	Christina River	106021	24.6667
1970-07-01	Qtr3	New Castle	Chesapeake Bay	Chesapeake and Delaware Canal	108021	25.6667
1970-07-01	Qtr3	New Castle	Delaware Bay	Appoquinimink River	109041	27
1970-07-01	Qtr3	New Castle	Delaware Bay	Appoquinimink River	109071	27
1970-10-01	Qtr4	Sussex	Delaware Bay	Broadkill River	303021	12.5
1970-10-01	Qtr4	Sussex	Delaware Bay	Broadkill River	303061	10.5
1970-10-01	Qtr4	Sussex	Inland Bays	Lewes-Rehoboth Canal	305011	9.7
1970-10-01	Qtr4	Sussex	Inland Bays	Rehoboth Bay	308031	10
1970-10-01	Qtr4	Sussex	Inland Bays	Little Assawoman Bay	310011	11
1970-10-01	Qtr4	New Castle	Piedmont	Red Clay Creek	103011	9.66667
1970-10-01	Qtr4	New Castle	Piedmont	Red Clay Creek	103031	9.66667
1970-10-01	Qtr4	New Castle	Piedmont	White Clay Creek	105031	9.33333
1970-10-01	Qtr4	New Castle	Piedmont	Christina River	106021	11.5
1970-10-01	Qtr4	New Castle	Chesapeake Bay	Chesapeake and Delaware Canal	108021	16.75
1971-01-01	Qtr1	New Castle	Piedmont	Red Clay Creek	103011	5.33333
1971-01-01	Qtr1	New Castle	Piedmont	Red Clay Creek	103031	5.5
1971-01-01	Qtr1	New Castle	Piedmont	White Clay Creek	105031	2.33333
1971-01-01	Qtr1	New Castle	Piedmont	Christina River	106021	2
1971-01-01	Qtr1	New Castle	Chesapeake Bay	Chesapeake and Delaware Canal	108021	2.25
1971-04-01	Qtr2	New Castle	Piedmont	Red Clay Creek	103011	14.6667
1971-04-01	Qtr2	New Castle	Piedmont	Red Clay Creek	103031	14.3333
1971-04-01	Qtr2	New Castle	Piedmont	White Clay Creek	105031	12.6667
1971-04-01	Qtr2	New Castle	Piedmont	Christina River	106021	16.5
1971-04-01	Qtr2	New Castle	Chesapeake Bay	Chesapeake and Delaware Canal	108021	18
1971-07-01	Qtr3	Sussex	Inland Bays	Lewes-Rehoboth Canal	305011	25
1971-07-01	Qtr3	Sussex	Inland Bays	Lewes-Rehoboth Canal	305041	24.3333
1971-07-01	Qtr3	Sussex	Inland Bays	Rehoboth Bay	306091	23.6667
1971-07-01	Qtr3	Sussex	Inland Bays	Indian River Bay	306111	20.6667
1971-07-01	Qtr3	Sussex	Inland Bays	Indian River Bay	306121	22.6667
1971-07-01	Qtr3	Sussex	Inland Bays	Indian River	306181	25.6667
1971-07-01	Qtr3	Sussex	Inland Bays	Buntings Branch	311041	22
1971-07-01	Qtr3	New Castle	Piedmont	Red Clay Creek	103011	22.6667
1971-07-01	Qtr3	New Castle	Piedmont	Red Clay Creek	103031	24
1971-07-01	Qtr3	New Castle	Piedmont	White Clay Creek	105031	20.25
1971-07-01	Qtr3	New Castle	Piedmont	Christina River	106021	24.5
1971-07-01	Qtr3	New Castle	Chesapeake Bay	Chesapeake and Delaware Canal	108021	26
1971-10-01	Qtr4	Sussex	Delaware Bay	Broadkill River	303021	8
1971-10-01	Qtr4	Sussex	Delaware Bay	Broadkill River	303061	7
1971-10-01	Qtr4	Sussex	Inland Bays	Lewes-Rehoboth Canal	305011	13.5
1971-10-01	Qtr4	Sussex	Inland Bays	Lewes-Rehoboth Canal	305041	14
1971-10-01	Qtr4	Sussex	Inland Bays	Rehoboth Bay	306091	17
1971-10-01	Qtr4	Sussex	Inland Bays	Indian River Bay	306111	17
1971-10-01	Qtr4	Sussex	Inland Bays	Indian River Bay	306121	16
1971-10-01	Qtr4	Sussex	Inland Bays	Indian River	306181	17
1971-10-01	Qtr4	Sussex	Inland Bays	Rehoboth Bay	308031	10
1971-10-01	Qtr4	New Castle	Piedmont	Red Clay Creek	103011	15.3333
1971-10-01	Qtr4	New Castle	Piedmont	Red Clay Creek	103031	14.8333
1971-10-01	Qtr4	New Castle	Piedmont	White Clay Creek	105031	14.75
1971-10-01	Qtr4	New Castle	Piedmont	Christina River	106021	14
1971-10-01	Qtr4	New Castle	Chesapeake Bay	Chesapeake and Delaware Canal	108021	17.5
1971-10-01	Qtr4	New Castle	Delaware Bay	Blackbird Creek	110041	20
1972-01-01	Qtr1	Sussex	Delaware Bay	Broadkill River	303061	5.5
1972-01-01	Qtr1	Sussex	Inland Bays	Lewes-Rehoboth Canal	305011	6
1972-01-01	Qtr1	Sussex	Inland Bays	Lewes-Rehoboth Canal	305041	5
1972-01-01	Qtr1	Sussex	Inland Bays	Indian River Bay	306121	6
1972-01-01	Qtr1	Sussex	Inland Bays	Indian River	306181	8
1972-01-01	Qtr1	Sussex	Inland Bays	Little Assawoman Bay	310011	6
1972-01-01	Qtr1	Sussex	Inland Bays	Buntings Branch	311041	7.5
1972-01-01	Qtr1	New Castle	Piedmont	Red Clay Creek	103011	5.5
1972-01-01	Qtr1	New Castle	Piedmont	Red Clay Creek	103031	7
1972-01-01	Qtr1	New Castle	Piedmont	White Clay Creek	105031	4.83333
1972-01-01	Qtr1	New Castle	Piedmont	Christina River	106021	5.66667
1972-01-01	Qtr1	New Castle	Chesapeake Bay	Chesapeake and Delaware Canal	108021	4.16667
1972-04-01	Qtr2	Sussex	Delaware Bay	Broadkill River	303061	10
1972-04-01	Qtr2	Sussex	Inland Bays	Lewes-Rehoboth Canal	305011	14.25
1972-04-01	Qtr2	Sussex	Inland Bays	Lewes-Rehoboth Canal	305041	14
1972-04-01	Qtr2	Sussex	Inland Bays	Indian River Bay	306111	5
1972-04-01	Qtr2	Sussex	Inland Bays	Indian River Bay	306121	6
1972-04-01	Qtr2	Sussex	Inland Bays	Indian River	306181	8
1972-04-01	Qtr2	Sussex	Inland Bays	Buntings Branch	311041	14
1972-04-01	Qtr2	New Castle	Piedmont	Red Clay Creek	103011	12.5
1972-04-01	Qtr2	New Castle	Piedmont	Red Clay Creek	103031	13.3333
1972-04-01	Qtr2	New Castle	Piedmont	White Clay Creek	105031	13.6667
1972-04-01	Qtr2	New Castle	Piedmont	Christina River	106021	15.6667
1972-04-01	Qtr2	New Castle	Chesapeake Bay	Chesapeake and Delaware Canal	108021	15
1972-07-01	Qtr3	Sussex	Delaware Bay	Broadkill River	303021	24
1972-07-01	Qtr3	Sussex	Delaware Bay	Broadkill River	303061	21
1972-07-01	Qtr3	Sussex	Inland Bays	Lewes-Rehoboth Canal	305041	23.5
1972-07-01	Qtr3	Sussex	Inland Bays	Rehoboth Bay	306091	25.5
1972-07-01	Qtr3	Sussex	Inland Bays	Indian River Bay	306111	24
1972-07-01	Qtr3	Sussex	Inland Bays	Indian River Bay	306121	24.5
1972-07-01	Qtr3	Sussex	Inland Bays	Indian River	306181	27
1972-07-01	Qtr3	Sussex	Inland Bays	Little Assawoman Bay	310011	19
1972-07-01	Qtr3	New Castle	Piedmont	Red Clay Creek	103011	20.6667
1972-07-01	Qtr3	New Castle	Piedmont	Red Clay Creek	103031	20.25
1972-07-01	Qtr3	New Castle	Piedmont	White Clay Creek	105031	21.6667
1972-07-01	Qtr3	New Castle	Piedmont	Christina River	106021	24.5
1972-07-01	Qtr3	New Castle	Chesapeake Bay	Chesapeake and Delaware Canal	108021	25
1972-07-01	Qtr3	New Castle	Delaware Bay	Dragon Creek	111031	24
1972-10-01	Qtr4	Sussex	Delaware Bay	Broadkill River	303061	10.6667
1972-10-01	Qtr4	Sussex	Inland Bays	Buntings Branch	311041	13.5
1972-10-01	Qtr4	New Castle	Piedmont	Red Clay Creek	103011	7.2
1972-10-01	Qtr4	New Castle	Piedmont	Red Clay Creek	103031	7.2
1972-10-01	Qtr4	New Castle	Piedmont	White Clay Creek	105031	7.5
1972-10-01	Qtr4	New Castle	Piedmont	Christina River	106021	9.5
1972-10-01	Qtr4	New Castle	Delaware Bay	Red Lion Creek	107011	5
1972-10-01	Qtr4	New Castle	Delaware Bay	Red Lion Creek	107031	5
1972-10-01	Qtr4	New Castle	Chesapeake Bay	Chesapeake and Delaware Canal	108021	13
1972-10-01	Qtr4	New Castle	Delaware Bay	Dragon Creek	111031	4
1973-01-01	Qtr1	Sussex	Delaware Bay	Broadkill River	303061	1
1973-01-01	Qtr1	Sussex	Inland Bays	Lewes-Rehoboth Canal	305011	3
1973-01-01	Qtr1	Sussex	Inland Bays	Rehoboth Bay	306091	7.15
1973-01-01	Qtr1	Sussex	Inland Bays	Indian River Bay	306111	9
1973-01-01	Qtr1	Sussex	Inland Bays	Indian River Bay	306121	3.9
1973-01-01	Qtr1	Sussex	Inland Bays	Indian River	306181	6.5
1973-01-01	Qtr1	Sussex	Chesapeake Bay	Broad Creek	307031	7
1973-01-01	Qtr1	Sussex	Inland Bays	Buntings Branch	311041	5
1973-01-01	Qtr1	New Castle	Piedmont	Red Clay Creek	103011	6.16667
1973-01-01	Qtr1	New Castle	Piedmont	Red Clay Creek	103031	5.83333
1973-01-01	Qtr1	New Castle	Piedmont	White Clay Creek	105031	4
1973-01-01	Qtr1	New Castle	Piedmont	Christina River	106021	4.2
1973-01-01	Qtr1	New Castle	Chesapeake Bay	Chesapeake and Delaware Canal	108021	4
1973-01-01	Qtr1	New Castle	Delaware Bay	Dragon Creek	111031	4
1973-04-01	Qtr2	Sussex	Delaware Bay	Broadkill River	303061	16
1973-04-01	Qtr2	Sussex	Inland Bays	Lewes-Rehoboth Canal	305041	22
1973-04-01	Qtr2	Sussex	Inland Bays	Rehoboth Bay	306091	12.4167
1973-04-01	Qtr2	Sussex	Inland Bays	Indian River Bay	306121	14.5786
1973-04-01	Qtr2	Sussex	Inland Bays	Indian River	306181	18.1357
1973-04-01	Qtr2	Sussex	Inland Bays	Buntings Branch	311041	12
1973-04-01	Qtr2	New Castle	Piedmont	Red Clay Creek	103011	15
1973-04-01	Qtr2	New Castle	Piedmont	Red Clay Creek	103031	15.3333
1973-04-01	Qtr2	New Castle	Piedmont	White Clay Creek	105031	13
1973-04-01	Qtr2	New Castle	Piedmont	Christina River	106021	15.3333
1973-04-01	Qtr2	New Castle	Delaware Bay	Red Lion Creek	107011	17.5
1973-04-01	Qtr2	New Castle	Delaware Bay	Red Lion Creek	107031	18
1973-04-01	Qtr2	New Castle	Chesapeake Bay	Chesapeake and Delaware Canal	108021	17.5
1973-07-01	Qtr3	Sussex	Delaware Bay	Broadkill River	303061	21
1973-07-01	Qtr3	Sussex	Inland Bays	Lewes-Rehoboth Canal	305041	23.3333
1973-07-01	Qtr3	Sussex	Inland Bays	Rehoboth Bay	306091	23.6667
1973-07-01	Qtr3	Sussex	Inland Bays	Indian River Bay	306111	22
1973-07-01	Qtr3	Sussex	Inland Bays	Indian River Bay	306121	23
1973-07-01	Qtr3	Sussex	Inland Bays	Indian River	306181	28
1973-07-01	Qtr3	Sussex	Chesapeake Bay	Broad Creek	307031	25
1973-07-01	Qtr3	Sussex	Inland Bays	Buntings Branch	311041	20.3333
1973-07-01	Qtr3	New Castle	Piedmont	Red Clay Creek	103011	123
1973-07-01	Qtr3	New Castle	Piedmont	Red Clay Creek	103031	23
1973-07-01	Qtr3	New Castle	Piedmont	White Clay Creek	105031	21.6667
1973-07-01	Qtr3	New Castle	Piedmont	Christina River	106021	26
1973-07-01	Qtr3	New Castle	Delaware Bay	Red Lion Creek	107011	22.25
1973-07-01	Qtr3	New Castle	Delaware Bay	Red Lion Creek	107031	25.25
1973-07-01	Qtr3	New Castle	Chesapeake Bay	Chesapeake and Delaware Canal	108021	27
1973-07-01	Qtr3	New Castle	Delaware Bay	Appoquinimink River	109041	30
1973-07-01	Qtr3	New Castle	Delaware Bay	Appoquinimink River	109071	29
1973-07-01	Qtr3	New Castle	Delaware Bay	Dragon Creek	111031	19.1667
1973-10-01	Qtr4	Sussex	Delaware Bay	Broadkill River	303061	14
1973-10-01	Qtr4	Sussex	Inland Bays	Lewes-Rehoboth Canal	305011	11.3333
1973-10-01	Qtr4	Sussex	Inland Bays	Lewes-Rehoboth Canal	305041	11.6667
1973-10-01	Qtr4	Sussex	Inland Bays	Indian River Bay	306121	11.3333
1973-10-01	Qtr4	Sussex	Inland Bays	Indian River	306181	11.5
1973-10-01	Qtr4	Sussex	Chesapeake Bay	Broad Creek	307031	11.6667
1973-10-01	Qtr4	Sussex	Inland Bays	Buntings Branch	311041	15.5
1973-10-01	Qtr4	New Castle	Piedmont	Red Clay Creek	103011	10.5
1973-10-01	Qtr4	New Castle	Piedmont	Red Clay Creek	103031	10.4
1973-10-01	Qtr4	New Castle	Piedmont	White Clay Creek	105031	12.1667
1973-10-01	Qtr4	New Castle	Piedmont	Christina River	106021	14
1973-10-01	Qtr4	New Castle	Delaware Bay	Red Lion Creek	107011	9.66667
1973-10-01	Qtr4	New Castle	Delaware Bay	Red Lion Creek	107031	11.3333
1973-10-01	Qtr4	New Castle	Chesapeake Bay	Chesapeake and Delaware Canal	108021	12.6667
1973-10-01	Qtr4	New Castle	Delaware Bay	Appoquinimink River	109041	12
1973-10-01	Qtr4	New Castle	Delaware Bay	Appoquinimink River	109071	12
1973-10-01	Qtr4	New Castle	Delaware Bay	Dragon Creek	111031	7.83333
1974-01-01	Qtr1	Sussex	Delaware Bay	Broadkill River	303021	6
1974-01-01	Qtr1	Sussex	Delaware Bay	Broadkill River	303061	6
1974-01-01	Qtr1	Sussex	Inland Bays	Lewes-Rehoboth Canal	305011	3.66667
1974-01-01	Qtr1	Sussex	Inland Bays	Lewes-Rehoboth Canal	305041	3.33333
1974-01-01	Qtr1	Sussex	Inland Bays	Indian River Bay	306121	7.15
1974-01-01	Qtr1	Sussex	Inland Bays	Indian River	306181	5.9
1974-01-01	Qtr1	Sussex	Chesapeake Bay	Broad Creek	307031	6.66667
1974-01-01	Qtr1	Sussex	Inland Bays	Little Assawoman Bay	310011	7
1974-01-01	Qtr1	New Castle	Piedmont	Red Clay Creek	103011	4.33333
1974-01-01	Qtr1	New Castle	Piedmont	Red Clay Creek	103031	5.66667
1974-01-01	Qtr1	New Castle	Piedmont	White Clay Creek	105031	2.66667
1974-01-01	Qtr1	New Castle	Delaware Bay	Red Lion Creek	107011	6.5
1974-01-01	Qtr1	New Castle	Delaware Bay	Red Lion Creek	107031	6.66667
1974-01-01	Qtr1	New Castle	Chesapeake Bay	Chesapeake and Delaware Canal	108021	5.25
1974-01-01	Qtr1	New Castle	Delaware Bay	Appoquinimink River	109041	4
1974-01-01	Qtr1	New Castle	Delaware Bay	Appoquinimink River	109071	4
1974-01-01	Qtr1	New Castle	Delaware Bay	Dragon Creek	111031	3
1974-04-01	Qtr2	Sussex	Inland Bays	Lewes-Rehoboth Canal	305011	15.5
1974-04-01	Qtr2	Sussex	Inland Bays	Lewes-Rehoboth Canal	305041	15.5
1974-04-01	Qtr2	Sussex	Inland Bays	Rehoboth Bay	306091	18
1974-04-01	Qtr2	Sussex	Inland Bays	Indian River Bay	306111	16
1974-04-01	Qtr2	Sussex	Inland Bays	Indian River Bay	306121	17
1974-04-01	Qtr2	Sussex	Inland Bays	Indian River	306181	20
1974-04-01	Qtr2	Sussex	Chesapeake Bay	Broad Creek	307031	17.5
1974-04-01	Qtr2	Sussex	Inland Bays	Buntings Branch	311041	17
1974-04-01	Qtr2	New Castle	Piedmont	Red Clay Creek	103011	17.5
1974-04-01	Qtr2	New Castle	Piedmont	Red Clay Creek	103031	17.6667
1974-04-01	Qtr2	New Castle	Piedmont	White Clay Creek	105031	9.5
1974-04-01	Qtr2	New Castle	Piedmont	Christina River	106021	17
1974-04-01	Qtr2	New Castle	Delaware Bay	Red Lion Creek	107011	15.6667
1974-04-01	Qtr2	New Castle	Delaware Bay	Red Lion Creek	107031	20.8333
1974-04-01	Qtr2	New Castle	Chesapeake Bay	Chesapeake and Delaware Canal	108021	20
1974-04-01	Qtr2	New Castle	Delaware Bay	Dragon Creek	111031	17.6667
1974-07-01	Qtr3	Sussex	Delaware Bay	Broadkill River	303061	23
1974-07-01	Qtr3	Sussex	Inland Bays	Lewes-Rehoboth Canal	305011	22.6667
1974-07-01	Qtr3	Sussex	Inland Bays	Lewes-Rehoboth Canal	305041	22.3333
1974-07-01	Qtr3	Sussex	Inland Bays	Rehoboth Bay	306091	22.6667
1974-07-01	Qtr3	Sussex	Inland Bays	Indian River Bay	306111	23
1974-07-01	Qtr3	Sussex	Inland Bays	Indian River Bay	306121	23
1974-07-01	Qtr3	Sussex	Inland Bays	Indian River	306181	23.6667
1974-07-01	Qtr3	Sussex	Inland Bays	Little Assawoman Bay	310011	29
1974-07-01	Qtr3	New Castle	Piedmont	Red Clay Creek	103011	22.6667
1974-07-01	Qtr3	New Castle	Piedmont	Red Clay Creek	103031	22.3333
1974-07-01	Qtr3	New Castle	Piedmont	White Clay Creek	105031	24
1974-07-01	Qtr3	New Castle	Delaware Bay	Red Lion Creek	107011	16.6667
1974-07-01	Qtr3	New Castle	Delaware Bay	Red Lion Creek	107031	21.3333
1974-07-01	Qtr3	New Castle	Delaware Bay	Dragon Creek	111031	18.6667
1974-10-01	Qtr4	Sussex	Delaware Bay	Broadkill River	303061	3
1974-10-01	Qtr4	Sussex	Inland Bays	Lewes-Rehoboth Canal	305011	8.5
1974-10-01	Qtr4	Sussex	Inland Bays	Lewes-Rehoboth Canal	305041	8
1974-10-01	Qtr4	Sussex	Inland Bays	Rehoboth Bay	306091	7.5
1974-10-01	Qtr4	Sussex	Inland Bays	Indian River Bay	306111	7
1974-10-01	Qtr4	Sussex	Inland Bays	Indian River Bay	306121	7.66667
1974-10-01	Qtr4	Sussex	Inland Bays	Indian River	306181	8
1974-10-01	Qtr4	Sussex	Chesapeake Bay	Broad Creek	307031	7
1974-10-01	Qtr4	Sussex	Inland Bays	Buntings Branch	311041	10
1974-10-01	Qtr4	New Castle	Piedmont	Red Clay Creek	103011	7.66667
1974-10-01	Qtr4	New Castle	Piedmont	Red Clay Creek	103031	8.33333
1974-10-01	Qtr4	New Castle	Delaware Bay	Red Lion Creek	107011	5.83333
1974-10-01	Qtr4	New Castle	Delaware Bay	Red Lion Creek	107031	7.33333
1974-10-01	Qtr4	New Castle	Chesapeake Bay	Chesapeake and Delaware Canal	108021	11
1974-10-01	Qtr4	New Castle	Delaware Bay	Dragon Creek	111031	6
1975-01-01	Qtr1	Sussex	Delaware Bay	Broadkill River	303061	1
1975-01-01	Qtr1	Sussex	Inland Bays	Lewes-Rehoboth Canal	305011	6.5
1975-01-01	Qtr1	Sussex	Inland Bays	Lewes-Rehoboth Canal	305041	6.5
1975-01-01	Qtr1	Sussex	Inland Bays	Rehoboth Bay	306091	5
1975-01-01	Qtr1	Sussex	Inland Bays	Indian River Bay	306111	3.5
1975-01-01	Qtr1	Sussex	Inland Bays	Indian River Bay	306121	4
1975-01-01	Qtr1	Sussex	Inland Bays	Indian River	306181	7
1975-01-01	Qtr1	Sussex	Chesapeake Bay	Broad Creek	307031	7
1975-01-01	Qtr1	Sussex	Inland Bays	Little Assawoman Bay	310011	4
1975-01-01	Qtr1	New Castle	Piedmont	Red Clay Creek	103011	1
1975-01-01	Qtr1	New Castle	Piedmont	Red Clay Creek	103031	1
1975-01-01	Qtr1	New Castle	Piedmont	White Clay Creek	105031	2
1975-01-01	Qtr1	New Castle	Piedmont	Christina River	106021	3
1975-01-01	Qtr1	New Castle	Delaware Bay	Red Lion Creek	107011	5.83333
1975-01-01	Qtr1	New Castle	Delaware Bay	Red Lion Creek	107031	6
1975-01-01	Qtr1	New Castle	Delaware Bay	Blackbird Creek	110041	9
1975-01-01	Qtr1	New Castle	Delaware Bay	Dragon Creek	111031	5.16667
1975-04-01	Qtr2	Sussex	Inland Bays	Lewes-Rehoboth Canal	305011	14.3333
1975-04-01	Qtr2	Sussex	Inland Bays	Lewes-Rehoboth Canal	305041	11
1975-04-01	Qtr2	Sussex	Inland Bays	Rehoboth Bay	306091	13.6667
1975-04-01	Qtr2	Sussex	Inland Bays	Indian River Bay	306111	13.3333
1975-04-01	Qtr2	Sussex	Inland Bays	Indian River Bay	306121	12.3333
1975-04-01	Qtr2	Sussex	Inland Bays	Indian River	306181	16.75
1975-04-01	Qtr2	Sussex	Chesapeake Bay	Broad Creek	307031	13.5
1975-04-01	Qtr2	New Castle	Piedmont	Red Clay Creek	103011	9.75
1975-04-01	Qtr2	New Castle	Piedmont	Red Clay Creek	103031	13.3333
1975-04-01	Qtr2	New Castle	Piedmont	White Clay Creek	105031	7
1975-04-01	Qtr2	New Castle	Piedmont	Christina River	106021	7
1975-04-01	Qtr2	New Castle	Delaware Bay	Red Lion Creek	107011	14
1975-04-01	Qtr2	New Castle	Delaware Bay	Red Lion Creek	107031	16.3333
1975-04-01	Qtr2	New Castle	Delaware Bay	Appoquinimink River	109041	21
1975-04-01	Qtr2	New Castle	Delaware Bay	Appoquinimink River	109071	21
1975-04-01	Qtr2	New Castle	Delaware Bay	Blackbird Creek	110041	22
1975-04-01	Qtr2	New Castle	Delaware Bay	Dragon Creek	111031	13.6667
1975-07-01	Qtr3	Sussex	Delaware Bay	Cedar Creek	301021	20
1975-07-01	Qtr3	Sussex	Delaware Bay	Cedar Creek	301031	19
1975-07-01	Qtr3	Sussex	Delaware Bay	Broadkill River	303061	23
1975-07-01	Qtr3	Sussex	Inland Bays	Lewes-Rehoboth Canal	305011	22.5
1975-07-01	Qtr3	Sussex	Inland Bays	Lewes-Rehoboth Canal	305041	22.5
1975-07-01	Qtr3	Sussex	Inland Bays	Rehoboth Bay	306091	22.5
1975-07-01	Qtr3	Sussex	Inland Bays	Indian River Bay	306111	22.5
1975-07-01	Qtr3	Sussex	Inland Bays	Indian River Bay	306121	21
1975-07-01	Qtr3	Sussex	Inland Bays	Indian River	306181	25
1975-07-01	Qtr3	Sussex	Chesapeake Bay	Broad Creek	307031	25
1975-07-01	Qtr3	New Castle	Piedmont	Red Clay Creek	103011	19.3333
1975-07-01	Qtr3	New Castle	Piedmont	Red Clay Creek	103031	18.8333
1975-07-01	Qtr3	New Castle	Piedmont	White Clay Creek	105031	19.5
1975-07-01	Qtr3	New Castle	Piedmont	Christina River	106021	24
1975-07-01	Qtr3	New Castle	Delaware Bay	Red Lion Creek	107011	21.3333
1975-07-01	Qtr3	New Castle	Delaware Bay	Red Lion Creek	107031	26.3333
1975-07-01	Qtr3	New Castle	Chesapeake Bay	Chesapeake and Delaware Canal	108021	24.5
1975-07-01	Qtr3	New Castle	Delaware Bay	Dragon Creek	111031	18
1975-10-01	Qtr4	Sussex	Delaware Bay	Broadkill River	303061	17.5
1975-10-01	Qtr4	Sussex	Inland Bays	Lewes-Rehoboth Canal	305011	10.25
1975-10-01	Qtr4	Sussex	Inland Bays	Lewes-Rehoboth Canal	305041	10.3333
1975-10-01	Qtr4	Sussex	Inland Bays	Rehoboth Bay	306091	10.5
1975-10-01	Qtr4	Sussex	Inland Bays	Indian River Bay	306111	11
1975-10-01	Qtr4	Sussex	Inland Bays	Indian River Bay	306121	10.6667
1975-10-01	Qtr4	Sussex	Inland Bays	Indian River	306181	10.6667
1975-10-01	Qtr4	Sussex	Chesapeake Bay	Broad Creek	307031	10.25
1975-10-01	Qtr4	New Castle	Piedmont	Red Clay Creek	103011	11
1975-10-01	Qtr4	New Castle	Piedmont	Red Clay Creek	103031	11.3333
1975-10-01	Qtr4	New Castle	Piedmont	White Clay Creek	105031	14
1975-10-01	Qtr4	New Castle	Piedmont	Christina River	106021	17
1975-10-01	Qtr4	New Castle	Delaware Bay	Red Lion Creek	107011	9.5
1975-10-01	Qtr4	New Castle	Delaware Bay	Red Lion Creek	107031	9
1975-10-01	Qtr4	New Castle	Chesapeake Bay	Chesapeake and Delaware Canal	108021	5
1975-10-01	Qtr4	New Castle	Delaware Bay	Dragon Creek	111031	8
1976-01-01	Qtr1	Sussex	Delaware Bay	Cedar Creek	301031	10
1976-01-01	Qtr1	Sussex	Delaware Bay	Broadkill River	303061	6.5
1976-01-01	Qtr1	Sussex	Inland Bays	Lewes-Rehoboth Canal	305011	6
1976-01-01	Qtr1	Sussex	Inland Bays	Lewes-Rehoboth Canal	305041	6.25
1976-01-01	Qtr1	Sussex	Inland Bays	Rehoboth Bay	306091	5.5
1976-01-01	Qtr1	Sussex	Inland Bays	Indian River Bay	306111	2
1976-01-01	Qtr1	Sussex	Inland Bays	Indian River Bay	306121	2
1976-01-01	Qtr1	Sussex	Inland Bays	Indian River	306181	8.25
1976-01-01	Qtr1	Sussex	Chesapeake Bay	Broad Creek	307031	3.66667
1976-01-01	Qtr1	Sussex	Inland Bays	Buntings Branch	311041	3
1976-01-01	Qtr1	New Castle	Piedmont	Red Clay Creek	103011	9
1976-01-01	Qtr1	New Castle	Piedmont	Christina River	106021	2
1976-01-01	Qtr1	New Castle	Chesapeake Bay	Chesapeake and Delaware Canal	108021	3.75
1976-01-01	Qtr1	New Castle	Delaware Bay	Appoquinimink River	109041	6.25
1976-01-01	Qtr1	New Castle	Delaware Bay	Appoquinimink River	109071	6
1976-01-01	Qtr1	New Castle	Delaware Bay	Blackbird Creek	110041	10
1976-01-01	Qtr1	New Castle	Delaware Bay	Dragon Creek	111031	4
1976-04-01	Qtr2	Sussex	Delaware Bay	Broadkill River	303061	16.8333
1976-04-01	Qtr2	Sussex	Inland Bays	Lewes-Rehoboth Canal	305011	14.5
1976-04-01	Qtr2	Sussex	Inland Bays	Lewes-Rehoboth Canal	305041	14.5
1976-04-01	Qtr2	Sussex	Inland Bays	Rehoboth Bay	306091	13.75
1976-04-01	Qtr2	Sussex	Inland Bays	Indian River Bay	306111	13.5
1976-04-01	Qtr2	Sussex	Inland Bays	Indian River Bay	306121	13.5
1976-04-01	Qtr2	Sussex	Inland Bays	Indian River	306181	16.5
1976-04-01	Qtr2	Sussex	Chesapeake Bay	Broad Creek	307031	20
1976-04-01	Qtr2	Sussex	Inland Bays	Buntings Branch	311041	16
1976-04-01	Qtr2	New Castle	Piedmont	Red Clay Creek	103011	12.3333
1976-04-01	Qtr2	New Castle	Piedmont	Red Clay Creek	103031	12.3333
1976-04-01	Qtr2	New Castle	Piedmont	Christina River	106021	11
1976-04-01	Qtr2	New Castle	Chesapeake Bay	Chesapeake and Delaware Canal	108021	20.5
1976-04-01	Qtr2	New Castle	Delaware Bay	Dragon Creek	111031	16.5
1976-07-01	Qtr3	Sussex	Delaware Bay	Broadkill River	303061	22.25
1976-07-01	Qtr3	Sussex	Inland Bays	Lewes-Rehoboth Canal	305011	23.6667
1976-07-01	Qtr3	Sussex	Inland Bays	Lewes-Rehoboth Canal	305041	23
1976-07-01	Qtr3	Sussex	Inland Bays	Rehoboth Bay	306091	23.5
1976-07-01	Qtr3	Sussex	Inland Bays	Indian River Bay	306111	23
1976-07-01	Qtr3	Sussex	Inland Bays	Indian River Bay	306121	25.25
1976-07-01	Qtr3	Sussex	Inland Bays	Indian River	306181	26.75
1976-07-01	Qtr3	Sussex	Inland Bays	Buntings Branch	311041	23
1976-07-01	Qtr3	New Castle	Piedmont	Red Clay Creek	103011	19.5
1976-07-01	Qtr3	New Castle	Piedmont	Red Clay Creek	103031	20.5
1976-07-01	Qtr3	New Castle	Chesapeake Bay	Chesapeake and Delaware Canal	108021	26.6667
1976-07-01	Qtr3	New Castle	Delaware Bay	Appoquinimink River	109041	25
1976-07-01	Qtr3	New Castle	Delaware Bay	Appoquinimink River	109071	24.5
1976-07-01	Qtr3	New Castle	Delaware Bay	Blackbird Creek	110041	24
1976-07-01	Qtr3	New Castle	Delaware Bay	Dragon Creek	111031	17.5
1976-10-01	Qtr4	Sussex	Delaware Bay	Broadkill River	303021	1
1976-10-01	Qtr4	Sussex	Delaware Bay	Broadkill River	303061	1
1976-10-01	Qtr4	Sussex	Inland Bays	Lewes-Rehoboth Canal	305011	7
1976-10-01	Qtr4	Sussex	Inland Bays	Lewes-Rehoboth Canal	305041	7.5
1976-10-01	Qtr4	Sussex	Inland Bays	Rehoboth Bay	306091	6
1976-10-01	Qtr4	Sussex	Inland Bays	Indian River Bay	306111	7
1976-10-01	Qtr4	Sussex	Inland Bays	Indian River Bay	306121	6
1976-10-01	Qtr4	Sussex	Inland Bays	Indian River	306181	7
1976-10-01	Qtr4	Sussex	Chesapeake Bay	Broad Creek	307031	6.5
1976-10-01	Qtr4	Sussex	Inland Bays	Rehoboth Bay	308031	2
1976-10-01	Qtr4	Sussex	Inland Bays	Buntings Branch	311041	7
1976-10-01	Qtr4	New Castle	Piedmont	Red Clay Creek	103011	5.33333
1976-10-01	Qtr4	New Castle	Piedmont	Red Clay Creek	103031	9.83333
1976-10-01	Qtr4	New Castle	Chesapeake Bay	Chesapeake and Delaware Canal	108021	8.83333
1976-10-01	Qtr4	New Castle	Delaware Bay	Appoquinimink River	109041	2.75
1976-10-01	Qtr4	New Castle	Delaware Bay	Appoquinimink River	109071	2.75
1976-10-01	Qtr4	New Castle	Delaware Bay	Dragon Creek	111031	10.5
1977-01-01	Qtr1	Sussex	Delaware Bay	Broadkill River	303021	5.5
1977-01-01	Qtr1	Sussex	Delaware Bay	Broadkill River	303061	6.33333
1977-01-01	Qtr1	Sussex	Inland Bays	Lewes-Rehoboth Canal	305011	4.33333
1977-01-01	Qtr1	Sussex	Inland Bays	Lewes-Rehoboth Canal	305041	7
1977-01-01	Qtr1	Sussex	Inland Bays	Rehoboth Bay	306091	6
1977-01-01	Qtr1	Sussex	Inland Bays	Indian River Bay	306111	5
1977-01-01	Qtr1	Sussex	Inland Bays	Indian River Bay	306121	6
1977-01-01	Qtr1	Sussex	Inland Bays	Indian River	306181	7
1977-01-01	Qtr1	Sussex	Chesapeake Bay	Broad Creek	307031	5
1977-01-01	Qtr1	Sussex	Inland Bays	Rehoboth Bay	308031	4
1977-01-01	Qtr1	Sussex	Inland Bays	Iron Branch	309041	7.33333
1977-01-01	Qtr1	Sussex	Inland Bays	Little Assawoman Bay	310011	6.33333
1977-01-01	Qtr1	Sussex	Inland Bays	Buntings Branch	311041	4.66667
1977-01-01	Qtr1	New Castle	Piedmont	Red Clay Creek	103011	4
1977-01-01	Qtr1	New Castle	Piedmont	Red Clay Creek	103031	4.25
1977-01-01	Qtr1	New Castle	Piedmont	White Clay Creek	105031	10
1977-01-01	Qtr1	New Castle	Piedmont	Christina River	106021	6
1977-01-01	Qtr1	New Castle	Delaware Bay	Red Lion Creek	107011	3.5
1977-01-01	Qtr1	New Castle	Delaware Bay	Red Lion Creek	107031	3.66667
1977-01-01	Qtr1	New Castle	Chesapeake Bay	Chesapeake and Delaware Canal	108021	1.66667
1977-01-01	Qtr1	New Castle	Delaware Bay	Appoquinimink River	109041	6
1977-01-01	Qtr1	New Castle	Delaware Bay	Appoquinimink River	109071	4.5
1977-01-01	Qtr1	New Castle	Delaware Bay	Blackbird Creek	110041	3.66667
1977-01-01	Qtr1	New Castle	Delaware Bay	Dragon Creek	111031	7.5
1977-04-01	Qtr2	Sussex	Delaware Bay	Broadkill River	303061	15
1977-04-01	Qtr2	Sussex	Chesapeake Bay	Broad Creek	307031	18.5
1977-04-01	Qtr2	Sussex	Inland Bays	Iron Branch	309041	16
1977-04-01	Qtr2	Sussex	Inland Bays	Little Assawoman Bay	310011	19.3333
1977-04-01	Qtr2	Sussex	Inland Bays	Buntings Branch	311041	16.6667
1977-04-01	Qtr2	New Castle	Piedmont	Red Clay Creek	103011	16
1977-04-01	Qtr2	New Castle	Piedmont	Red Clay Creek	103031	15.5
1977-04-01	Qtr2	New Castle	Piedmont	White Clay Creek	105031	16.5
1977-04-01	Qtr2	New Castle	Piedmont	Christina River	106021	18.25
1977-04-01	Qtr2	New Castle	Delaware Bay	Red Lion Creek	107011	12.6667
1977-04-01	Qtr2	New Castle	Delaware Bay	Red Lion Creek	107031	14.3333
1977-04-01	Qtr2	New Castle	Chesapeake Bay	Chesapeake and Delaware Canal	108021	15.3333
1977-04-01	Qtr2	New Castle	Delaware Bay	Appoquinimink River	109041	21
1977-04-01	Qtr2	New Castle	Delaware Bay	Appoquinimink River	109071	20.5
1977-04-01	Qtr2	New Castle	Delaware Bay	Blackbird Creek	110041	20
1977-04-01	Qtr2	New Castle	Delaware Bay	Dragon Creek	111031	12.6667
1977-07-01	Qtr3	Sussex	Delaware Bay	Broadkill River	303061	23.3333
1977-07-01	Qtr3	Sussex	Inland Bays	Lewes-Rehoboth Canal	305041	24.5
1977-07-01	Qtr3	Sussex	Inland Bays	Rehoboth Bay	306091	24.5
1977-07-01	Qtr3	Sussex	Inland Bays	Indian River Bay	306111	22
1977-07-01	Qtr3	Sussex	Inland Bays	Indian River Bay	306121	22
1977-07-01	Qtr3	Sussex	Inland Bays	Indian River	306181	27.3333
1977-07-01	Qtr3	Sussex	Chesapeake Bay	Broad Creek	307031	27
1977-07-01	Qtr3	Sussex	Inland Bays	Iron Branch	309041	22
1977-07-01	Qtr3	Sussex	Inland Bays	Little Assawoman Bay	310011	27
1977-07-01	Qtr3	New Castle	Piedmont	Red Clay Creek	103011	24
1977-07-01	Qtr3	New Castle	Piedmont	Red Clay Creek	103031	23
1977-07-01	Qtr3	New Castle	Piedmont	White Clay Creek	105031	22.6667
1977-07-01	Qtr3	New Castle	Piedmont	Christina River	106021	26
1977-07-01	Qtr3	New Castle	Delaware Bay	Red Lion Creek	107011	21
1977-07-01	Qtr3	New Castle	Delaware Bay	Red Lion Creek	107031	24
1977-07-01	Qtr3	New Castle	Chesapeake Bay	Chesapeake and Delaware Canal	108021	26.6667
1977-07-01	Qtr3	New Castle	Delaware Bay	Appoquinimink River	109041	27
1977-07-01	Qtr3	New Castle	Delaware Bay	Appoquinimink River	109071	26.6667
1977-07-01	Qtr3	New Castle	Delaware Bay	Blackbird Creek	110041	25.5
1977-07-01	Qtr3	New Castle	Delaware Bay	Dragon Creek	111031	23.6667
1977-10-01	Qtr4	Sussex	Delaware Bay	Broadkill River	303021	3
1977-10-01	Qtr4	Sussex	Delaware Bay	Broadkill River	303061	7.33333
1977-10-01	Qtr4	Sussex	Inland Bays	Lewes-Rehoboth Canal	305011	8.5
1977-10-01	Qtr4	Sussex	Inland Bays	Lewes-Rehoboth Canal	305041	11
1977-10-01	Qtr4	Sussex	Inland Bays	Rehoboth Bay	306091	16
1977-10-01	Qtr4	Sussex	Inland Bays	Indian River Bay	306111	16
1977-10-01	Qtr4	Sussex	Inland Bays	Indian River Bay	306121	17
1977-10-01	Qtr4	Sussex	Inland Bays	Indian River	306181	18
1977-10-01	Qtr4	Sussex	Chesapeake Bay	Broad Creek	307031	10.6667
1977-10-01	Qtr4	Sussex	Inland Bays	Iron Branch	309041	1
1977-10-01	Qtr4	Sussex	Inland Bays	Little Assawoman Bay	310011	11.6667
1977-10-01	Qtr4	Sussex	Inland Bays	Buntings Branch	311041	10.75
1977-10-01	Qtr4	New Castle	Piedmont	Red Clay Creek	103011	10.3333
1977-10-01	Qtr4	New Castle	Piedmont	Red Clay Creek	103031	10.3333
1977-10-01	Qtr4	New Castle	Piedmont	White Clay Creek	105031	6
1977-10-01	Qtr4	New Castle	Piedmont	Christina River	106021	11.3333
1977-10-01	Qtr4	New Castle	Delaware Bay	Red Lion Creek	107011	6.66667
1977-10-01	Qtr4	New Castle	Delaware Bay	Red Lion Creek	107031	6.33333
1977-10-01	Qtr4	New Castle	Chesapeake Bay	Chesapeake and Delaware Canal	108021	9
1977-10-01	Qtr4	New Castle	Delaware Bay	Appoquinimink River	109041	0
1977-10-01	Qtr4	New Castle	Delaware Bay	Appoquinimink River	109071	0
1977-10-01	Qtr4	New Castle	Delaware Bay	Blackbird Creek	110041	2
1977-10-01	Qtr4	New Castle	Delaware Bay	Dragon Creek	111031	4.66667
1978-01-01	Qtr1	Sussex	Delaware Bay	Broadkill River	303021	3.5
1978-01-01	Qtr1	Sussex	Delaware Bay	Broadkill River	303061	1.66667
1978-01-01	Qtr1	Sussex	Inland Bays	Lewes-Rehoboth Canal	305011	3
1978-01-01	Qtr1	Sussex	Inland Bays	Lewes-Rehoboth Canal	305041	2
1978-01-01	Qtr1	Sussex	Inland Bays	Rehoboth Bay	306091	5
1978-01-01	Qtr1	Sussex	Inland Bays	Indian River Bay	306111	3
1978-01-01	Qtr1	Sussex	Inland Bays	Indian River Bay	306121	6
1978-01-01	Qtr1	Sussex	Inland Bays	Indian River	306181	6
1978-01-01	Qtr1	Sussex	Chesapeake Bay	Broad Creek	307031	3
1978-01-01	Qtr1	Sussex	Inland Bays	Iron Branch	309041	10
1978-01-01	Qtr1	Sussex	Inland Bays	Little Assawoman Bay	310011	4
1978-01-01	Qtr1	Sussex	Inland Bays	Buntings Branch	311041	5.33333
1978-01-01	Qtr1	New Castle	Piedmont	Red Clay Creek	103011	2
1978-01-01	Qtr1	New Castle	Piedmont	Red Clay Creek	103031	2.33333
1978-01-01	Qtr1	New Castle	Piedmont	White Clay Creek	105031	1
1978-01-01	Qtr1	New Castle	Piedmont	Christina River	106021	5
1978-01-01	Qtr1	New Castle	Delaware Bay	Red Lion Creek	107011	4.33333
1978-01-01	Qtr1	New Castle	Delaware Bay	Red Lion Creek	107031	4.33333
1978-01-01	Qtr1	New Castle	Chesapeake Bay	Chesapeake and Delaware Canal	108021	1
1978-01-01	Qtr1	New Castle	Delaware Bay	Appoquinimink River	109041	3.5
1978-01-01	Qtr1	New Castle	Delaware Bay	Blackbird Creek	110041	1.5
1978-01-01	Qtr1	New Castle	Delaware Bay	Dragon Creek	111031	1
1978-04-01	Qtr2	Sussex	Delaware Bay	Broadkill River	303061	17.3333
1978-04-01	Qtr2	Sussex	Inland Bays	Lewes-Rehoboth Canal	305011	16
1978-04-01	Qtr2	Sussex	Inland Bays	Lewes-Rehoboth Canal	305041	15.6667
1978-04-01	Qtr2	Sussex	Inland Bays	Rehoboth Bay	306091	15
1978-04-01	Qtr2	Sussex	Inland Bays	Indian River Bay	306111	14
1978-04-01	Qtr2	Sussex	Inland Bays	Indian River Bay	306121	14.3333
1978-04-01	Qtr2	Sussex	Inland Bays	Indian River	306181	17
1978-04-01	Qtr2	Sussex	Chesapeake Bay	Broad Creek	307031	16
1978-04-01	Qtr2	Sussex	Inland Bays	Little Assawoman Bay	310011	18.5
1978-04-01	Qtr2	Sussex	Inland Bays	Buntings Branch	311041	19
1978-04-01	Qtr2	New Castle	Piedmont	Red Clay Creek	103011	13.8333
1978-04-01	Qtr2	New Castle	Piedmont	Red Clay Creek	103031	13.5
1978-04-01	Qtr2	New Castle	Piedmont	White Clay Creek	105031	14.5
1978-04-01	Qtr2	New Castle	Piedmont	Christina River	106021	15.6667
1978-04-01	Qtr2	New Castle	Delaware Bay	Red Lion Creek	107011	14.3333
1978-04-01	Qtr2	New Castle	Delaware Bay	Red Lion Creek	107031	17.6667
1978-04-01	Qtr2	New Castle	Chesapeake Bay	Chesapeake and Delaware Canal	108021	17
1978-04-01	Qtr2	New Castle	Delaware Bay	Appoquinimink River	109041	14.5
1978-04-01	Qtr2	New Castle	Delaware Bay	Blackbird Creek	110041	14.5
1978-04-01	Qtr2	New Castle	Delaware Bay	Dragon Creek	111031	15
1978-07-01	Qtr3	Sussex	Delaware Bay	Broadkill River	303061	24.1667
1978-07-01	Qtr3	Sussex	Inland Bays	Lewes-Rehoboth Canal	305011	25.6667
1978-07-01	Qtr3	Sussex	Inland Bays	Lewes-Rehoboth Canal	305041	25.6667
1978-07-01	Qtr3	Sussex	Inland Bays	Rehoboth Bay	306091	25.3333
1978-07-01	Qtr3	Sussex	Inland Bays	Indian River Bay	306111	23
1978-07-01	Qtr3	Sussex	Inland Bays	Indian River Bay	306121	23
1978-07-01	Qtr3	Sussex	Inland Bays	Indian River	306181	27
1978-07-01	Qtr3	Sussex	Chesapeake Bay	Broad Creek	307031	26.25
1978-07-01	Qtr3	Sussex	Inland Bays	Buntings Branch	311041	22
1978-07-01	Qtr3	New Castle	Piedmont	Red Clay Creek	103011	23.5
1978-07-01	Qtr3	New Castle	Piedmont	Red Clay Creek	103031	23
1978-07-01	Qtr3	New Castle	Piedmont	White Clay Creek	105031	22.6667
1978-07-01	Qtr3	New Castle	Piedmont	Christina River	106021	23.6667
1978-07-01	Qtr3	New Castle	Delaware Bay	Red Lion Creek	107011	20
1978-07-01	Qtr3	New Castle	Delaware Bay	Red Lion Creek	107031	21.5
1978-07-01	Qtr3	New Castle	Chesapeake Bay	Chesapeake and Delaware Canal	108021	25.6667
1978-07-01	Qtr3	New Castle	Delaware Bay	Appoquinimink River	109041	28
1978-07-01	Qtr3	New Castle	Delaware Bay	Dragon Creek	111031	25
1978-10-01	Qtr4	Sussex	Delaware Bay	Broadkill River	303061	14
1978-10-01	Qtr4	Sussex	Inland Bays	Lewes-Rehoboth Canal	305011	8.5
1978-10-01	Qtr4	Sussex	Inland Bays	Lewes-Rehoboth Canal	305041	8
1978-10-01	Qtr4	Sussex	Inland Bays	Rehoboth Bay	306091	8.5
1978-10-01	Qtr4	Sussex	Inland Bays	Indian River Bay	306111	9.5
1978-10-01	Qtr4	Sussex	Inland Bays	Indian River Bay	306121	10.5
1978-10-01	Qtr4	Sussex	Inland Bays	Indian River	306181	10.5
1978-10-01	Qtr4	Sussex	Chesapeake Bay	Broad Creek	307031	12
1978-10-01	Qtr4	Sussex	Inland Bays	Little Assawoman Bay	310011	12
1978-10-01	Qtr4	Sussex	Inland Bays	Buntings Branch	311041	12
1978-10-01	Qtr4	New Castle	Piedmont	White Clay Creek	105031	6.33333
1978-10-01	Qtr4	New Castle	Piedmont	Christina River	106021	10
1978-10-01	Qtr4	New Castle	Delaware Bay	Red Lion Creek	107011	12.5
1978-10-01	Qtr4	New Castle	Delaware Bay	Red Lion Creek	107031	14.5
1978-10-01	Qtr4	New Castle	Chesapeake Bay	Chesapeake and Delaware Canal	108021	12
1978-10-01	Qtr4	New Castle	Delaware Bay	Appoquinimink River	109041	6
1978-10-01	Qtr4	New Castle	Delaware Bay	Dragon Creek	111031	10.5
1979-01-01	Qtr1	Sussex	Delaware Bay	Broadkill River	303021	10
1979-01-01	Qtr1	Sussex	Inland Bays	Lewes-Rehoboth Canal	305011	6.5
1979-01-01	Qtr1	Sussex	Inland Bays	Lewes-Rehoboth Canal	305041	6
1979-01-01	Qtr1	Sussex	Inland Bays	Rehoboth Bay	306091	3
1979-01-01	Qtr1	Sussex	Inland Bays	Indian River Bay	306111	3
1979-01-01	Qtr1	Sussex	Inland Bays	Indian River Bay	306121	4
1979-01-01	Qtr1	Sussex	Inland Bays	Indian River	306181	6
1979-01-01	Qtr1	Sussex	Chesapeake Bay	Broad Creek	307031	12
1979-01-01	Qtr1	Sussex	Inland Bays	Rehoboth Bay	308031	6
1979-01-01	Qtr1	Sussex	Inland Bays	Little Assawoman Bay	310011	16
1979-01-01	Qtr1	Sussex	Inland Bays	Buntings Branch	311041	7
1979-01-01	Qtr1	New Castle	Piedmont	Red Clay Creek	103011	3.66667
1979-01-01	Qtr1	New Castle	Piedmont	Red Clay Creek	103031	4
1979-01-01	Qtr1	New Castle	Piedmont	White Clay Creek	105031	1
1979-01-01	Qtr1	New Castle	Piedmont	Christina River	106021	4
1979-01-01	Qtr1	New Castle	Delaware Bay	Red Lion Creek	107011	4.5
1979-01-01	Qtr1	New Castle	Delaware Bay	Red Lion Creek	107031	6.5
1979-01-01	Qtr1	New Castle	Chesapeake Bay	Chesapeake and Delaware Canal	108021	3.5
1979-01-01	Qtr1	New Castle	Delaware Bay	Appoquinimink River	109041	9
1979-01-01	Qtr1	New Castle	Delaware Bay	Dragon Creek	111031	5.5
1979-04-01	Qtr2	Sussex	Delaware Bay	Cedar Creek	301021	22
1979-04-01	Qtr2	Sussex	Delaware Bay	Cedar Creek	301031	21
1979-04-01	Qtr2	Sussex	Delaware Bay	Broadkill River	303021	16
1979-04-01	Qtr2	Sussex	Delaware Bay	Broadkill River	303061	19
1979-04-01	Qtr2	Sussex	Delaware Bay	Broadkill River	303331	21
1979-04-01	Qtr2	Sussex	Inland Bays	Lewes-Rehoboth Canal	305011	15.5
1979-04-01	Qtr2	Sussex	Inland Bays	Lewes-Rehoboth Canal	305041	14
1979-04-01	Qtr2	Sussex	Inland Bays	Rehoboth Bay	306091	13.5
1979-04-01	Qtr2	Sussex	Inland Bays	Indian River Bay	306111	15
1979-04-01	Qtr2	Sussex	Inland Bays	Indian River Bay	306121	16
1979-04-01	Qtr2	Sussex	Inland Bays	Indian River	306181	19
1979-04-01	Qtr2	Sussex	Chesapeake Bay	Broad Creek	307031	16.5
1979-04-01	Qtr2	Sussex	Inland Bays	Little Assawoman Bay	310011	18.6667
1979-04-01	Qtr2	Sussex	Inland Bays	Buntings Branch	311041	21
1979-04-01	Qtr2	New Castle	Piedmont	Red Clay Creek	103011	16.5
1979-04-01	Qtr2	New Castle	Piedmont	Red Clay Creek	103031	16.3333
1979-04-01	Qtr2	New Castle	Piedmont	White Clay Creek	105031	16.1667
1979-04-01	Qtr2	New Castle	Piedmont	Christina River	106021	18.3333
1979-04-01	Qtr2	New Castle	Delaware Bay	Red Lion Creek	107011	13.6667
1979-04-01	Qtr2	New Castle	Delaware Bay	Red Lion Creek	107031	18
1979-04-01	Qtr2	New Castle	Chesapeake Bay	Chesapeake and Delaware Canal	108021	19
1979-04-01	Qtr2	New Castle	Delaware Bay	Appoquinimink River	109041	18
1979-04-01	Qtr2	New Castle	Delaware Bay	Blackbird Creek	110041	20
1979-04-01	Qtr2	New Castle	Delaware Bay	Dragon Creek	111031	15.5
1979-07-01	Qtr3	Sussex	Delaware Bay	Cedar Creek	301021	18
1979-07-01	Qtr3	Sussex	Delaware Bay	Cedar Creek	301031	18
1979-07-01	Qtr3	Sussex	Delaware Bay	Broadkill River	303061	19
1979-07-01	Qtr3	Sussex	Delaware Bay	Broadkill River	303331	23.25
1979-07-01	Qtr3	Sussex	Chesapeake Bay	Nanticoke River	304191	21.8889
1979-07-01	Qtr3	Sussex	Inland Bays	Lewes-Rehoboth Canal	305011	23.5
1979-07-01	Qtr3	Sussex	Inland Bays	Lewes-Rehoboth Canal	305041	22.5
1979-07-01	Qtr3	Sussex	Inland Bays	Rehoboth Bay	306091	24
1979-07-01	Qtr3	Sussex	Inland Bays	Indian River Bay	306111	22.5
1979-07-01	Qtr3	Sussex	Inland Bays	Indian River Bay	306121	24
1979-07-01	Qtr3	Sussex	Inland Bays	Indian River	306181	26
1979-07-01	Qtr3	Sussex	Inland Bays	Buntings Branch	311041	22
1979-07-01	Qtr3	Sussex	Chesapeake Bay	Gravelly Branch	316011	22.8889
1979-07-01	Qtr3	New Castle	Piedmont	Red Clay Creek	103011	23
1979-07-01	Qtr3	New Castle	Piedmont	Red Clay Creek	103031	23
1979-07-01	Qtr3	New Castle	Piedmont	White Clay Creek	105031	20.3333
1979-07-01	Qtr3	New Castle	Piedmont	Christina River	106021	24
1979-07-01	Qtr3	New Castle	Delaware Bay	Red Lion Creek	107011	21.5
1979-07-01	Qtr3	New Castle	Delaware Bay	Red Lion Creek	107031	25.5
1979-07-01	Qtr3	New Castle	Chesapeake Bay	Chesapeake and Delaware Canal	108021	23
1979-07-01	Qtr3	New Castle	Delaware Bay	Appoquinimink River	109041	21.5
1979-07-01	Qtr3	New Castle	Delaware Bay	Dragon Creek	111031	21
1979-10-01	Qtr4	Sussex	Delaware Bay	Cedar Creek	301021	10.5
1979-10-01	Qtr4	Sussex	Delaware Bay	Cedar Creek	301031	10.5
1979-10-01	Qtr4	Sussex	Delaware Bay	Broadkill River	303021	15.5
1979-10-01	Qtr4	Sussex	Delaware Bay	Broadkill River	303061	12
1979-10-01	Qtr4	Sussex	Delaware Bay	Broadkill River	303331	20.5
1979-10-01	Qtr4	Sussex	Chesapeake Bay	Nanticoke River	304191	20
1979-10-01	Qtr4	Sussex	Inland Bays	Lewes-Rehoboth Canal	305011	9.66667
1979-10-01	Qtr4	Sussex	Inland Bays	Lewes-Rehoboth Canal	305041	8.5
1979-10-01	Qtr4	Sussex	Inland Bays	Rehoboth Bay	306091	9.33333
1979-10-01	Qtr4	Sussex	Inland Bays	Indian River Bay	306111	9.66667
1979-10-01	Qtr4	Sussex	Inland Bays	Indian River Bay	306121	10
1979-10-01	Qtr4	Sussex	Inland Bays	Indian River	306181	9.66667
1979-10-01	Qtr4	Sussex	Chesapeake Bay	Broad Creek	307031	12.25
1979-10-01	Qtr4	Sussex	Inland Bays	Iron Branch	309041	6
1979-10-01	Qtr4	Sussex	Inland Bays	Buntings Branch	311041	9
1979-10-01	Qtr4	Sussex	Chesapeake Bay	Gravelly Branch	316011	21
1979-10-01	Qtr4	New Castle	Piedmont	Red Clay Creek	103011	7.66667
1979-10-01	Qtr4	New Castle	Piedmont	Red Clay Creek	103031	8.16667
1979-10-01	Qtr4	New Castle	Piedmont	White Clay Creek	105031	6.33333
1979-10-01	Qtr4	New Castle	Piedmont	Christina River	106021	9.33333
1979-10-01	Qtr4	New Castle	Delaware Bay	Red Lion Creek	107011	6.5
1979-10-01	Qtr4	New Castle	Delaware Bay	Red Lion Creek	107031	6
1979-10-01	Qtr4	New Castle	Chesapeake Bay	Chesapeake and Delaware Canal	108021	10.6667
1979-10-01	Qtr4	New Castle	Delaware Bay	Appoquinimink River	109041	9.33333
1979-10-01	Qtr4	New Castle	Delaware Bay	Blackbird Creek	110041	10
1979-10-01	Qtr4	New Castle	Delaware Bay	Dragon Creek	111031	7
1980-01-01	Qtr1	Sussex	Delaware Bay	Cedar Creek	301021	10
1980-01-01	Qtr1	Sussex	Delaware Bay	Cedar Creek	301031	9.5
1980-01-01	Qtr1	Sussex	Delaware Bay	Broadkill River	303021	9
1980-01-01	Qtr1	Sussex	Delaware Bay	Broadkill River	303061	8
1980-01-01	Qtr1	Sussex	Delaware Bay	Broadkill River	303331	7
1980-01-01	Qtr1	Sussex	Inland Bays	Lewes-Rehoboth Canal	305011	5.33333
1980-01-01	Qtr1	Sussex	Inland Bays	Lewes-Rehoboth Canal	305041	4.66667
1980-01-01	Qtr1	Sussex	Inland Bays	Rehoboth Bay	306091	10
1980-01-01	Qtr1	Sussex	Inland Bays	Indian River Bay	306111	9
1980-01-01	Qtr1	Sussex	Inland Bays	Indian River Bay	306121	10
1980-01-01	Qtr1	Sussex	Inland Bays	Indian River	306181	11
1980-01-01	Qtr1	Sussex	Chesapeake Bay	Broad Creek	307031	4.33333
1980-01-01	Qtr1	Sussex	Inland Bays	Rehoboth Bay	308031	4
1980-01-01	Qtr1	Sussex	Inland Bays	Iron Branch	309041	8
1980-01-01	Qtr1	Sussex	Inland Bays	Little Assawoman Bay	310011	7
1980-01-01	Qtr1	Sussex	Inland Bays	Buntings Branch	311041	5
1980-01-01	Qtr1	New Castle	Piedmont	Red Clay Creek	103011	3.66667
1980-01-01	Qtr1	New Castle	Piedmont	Red Clay Creek	103031	4
1980-01-01	Qtr1	New Castle	Piedmont	White Clay Creek	105031	2.66667
1980-01-01	Qtr1	New Castle	Piedmont	Christina River	106021	1.5
1980-01-01	Qtr1	New Castle	Delaware Bay	Red Lion Creek	107011	1.5
1980-01-01	Qtr1	New Castle	Delaware Bay	Red Lion Creek	107031	3
1980-01-01	Qtr1	New Castle	Chesapeake Bay	Chesapeake and Delaware Canal	108021	4
1980-01-01	Qtr1	New Castle	Delaware Bay	Appoquinimink River	109041	8
1980-01-01	Qtr1	New Castle	Delaware Bay	Blackbird Creek	110041	7
1980-01-01	Qtr1	New Castle	Delaware Bay	Dragon Creek	111031	2.66667
1980-04-01	Qtr2	Sussex	Delaware Bay	Cedar Creek	301021	15
1980-04-01	Qtr2	Sussex	Delaware Bay	Cedar Creek	301031	15
1980-04-01	Qtr2	Sussex	Delaware Bay	Broadkill River	303061	9
1980-04-01	Qtr2	Sussex	Inland Bays	Lewes-Rehoboth Canal	305011	18.3333
1980-04-01	Qtr2	Sussex	Inland Bays	Lewes-Rehoboth Canal	305041	16.6667
1980-04-01	Qtr2	Sussex	Inland Bays	Rehoboth Bay	306091	16.5
1980-04-01	Qtr2	Sussex	Inland Bays	Indian River Bay	306111	15.8333
1980-04-01	Qtr2	Sussex	Inland Bays	Indian River Bay	306121	15.8333
1980-04-01	Qtr2	Sussex	Inland Bays	Indian River	306181	19.6667
1980-04-01	Qtr2	Sussex	Chesapeake Bay	Broad Creek	307031	17.5
1980-04-01	Qtr2	Sussex	Inland Bays	Little Assawoman Bay	310011	16
1980-04-01	Qtr2	Sussex	Inland Bays	Buntings Branch	311041	16.5
1980-04-01	Qtr2	New Castle	Piedmont	Red Clay Creek	103011	16.5833
1980-04-01	Qtr2	New Castle	Piedmont	Red Clay Creek	103031	16.25
1980-04-01	Qtr2	New Castle	Piedmont	White Clay Creek	105031	15.375
1980-04-01	Qtr2	New Castle	Piedmont	Christina River	106021	17.6667
1980-04-01	Qtr2	New Castle	Delaware Bay	Red Lion Creek	107011	16
1980-04-01	Qtr2	New Castle	Delaware Bay	Red Lion Creek	107031	18
1980-04-01	Qtr2	New Castle	Chesapeake Bay	Chesapeake and Delaware Canal	108021	17.3333
1980-04-01	Qtr2	New Castle	Delaware Bay	Appoquinimink River	109041	19.4
1980-04-01	Qtr2	New Castle	Delaware Bay	Appoquinimink River	109121	20.2
1980-04-01	Qtr2	New Castle	Delaware Bay	Appoquinimink River	109131	20.4
1980-04-01	Qtr2	New Castle	Delaware Bay	Blackbird Creek	110041	16
1980-04-01	Qtr2	New Castle	Delaware Bay	Dragon Creek	111031	20.5
1980-07-01	Qtr3	Sussex	Delaware Bay	Broadkill River	303061	24
1980-07-01	Qtr3	Sussex	Inland Bays	Lewes-Rehoboth Canal	305011	25.5
1980-07-01	Qtr3	Sussex	Inland Bays	Lewes-Rehoboth Canal	305041	25.5
1980-07-01	Qtr3	Sussex	Inland Bays	Rehoboth Bay	306091	23.5
1980-07-01	Qtr3	Sussex	Inland Bays	Indian River Bay	306111	22
1980-07-01	Qtr3	Sussex	Inland Bays	Indian River Bay	306121	25
1980-07-01	Qtr3	Sussex	Inland Bays	Indian River	306181	26
1980-07-01	Qtr3	Sussex	Chesapeake Bay	Broad Creek	307031	24
1980-07-01	Qtr3	Sussex	Inland Bays	Little Assawoman Bay	310011	30
1980-07-01	Qtr3	Sussex	Inland Bays	Buntings Branch	311041	29
1980-07-01	Qtr3	New Castle	Piedmont	Red Clay Creek	103011	22.3333
1980-07-01	Qtr3	New Castle	Piedmont	Red Clay Creek	103031	22.3333
1980-07-01	Qtr3	New Castle	Piedmont	White Clay Creek	105031	22.5
1980-07-01	Qtr3	New Castle	Piedmont	Christina River	106021	27
1980-07-01	Qtr3	New Castle	Delaware Bay	Red Lion Creek	107011	22.3333
1980-07-01	Qtr3	New Castle	Delaware Bay	Red Lion Creek	107031	24.6667
1980-07-01	Qtr3	New Castle	Chesapeake Bay	Chesapeake and Delaware Canal	108021	26.6667
1980-07-01	Qtr3	New Castle	Delaware Bay	Appoquinimink River	109041	26.8333
1980-07-01	Qtr3	New Castle	Delaware Bay	Appoquinimink River	109121	26.3
1980-07-01	Qtr3	New Castle	Delaware Bay	Appoquinimink River	109131	26.6
1980-07-01	Qtr3	New Castle	Delaware Bay	Dragon Creek	111031	22
1980-10-01	Qtr4	Sussex	Delaware Bay	Cedar Creek	301021	15
1980-10-01	Qtr4	Sussex	Delaware Bay	Cedar Creek	301031	15
1980-10-01	Qtr4	Sussex	Delaware Bay	Broadkill River	303021	8.5
1980-10-01	Qtr4	Sussex	Delaware Bay	Broadkill River	303061	11
1980-10-01	Qtr4	Sussex	Inland Bays	Lewes-Rehoboth Canal	305011	8.66667
1980-10-01	Qtr4	Sussex	Inland Bays	Lewes-Rehoboth Canal	305041	9.33333
1980-10-01	Qtr4	Sussex	Inland Bays	Rehoboth Bay	306091	8
1980-10-01	Qtr4	Sussex	Inland Bays	Indian River Bay	306111	9
1980-10-01	Qtr4	Sussex	Inland Bays	Indian River Bay	306121	10.5
1980-10-01	Qtr4	Sussex	Inland Bays	Indian River	306181	7
1980-10-01	Qtr4	Sussex	Chesapeake Bay	Broad Creek	307031	7.5
1980-10-01	Qtr4	Sussex	Inland Bays	Little Assawoman Bay	310011	5
1980-10-01	Qtr4	Sussex	Inland Bays	Buntings Branch	311041	7.5
1980-10-01	Qtr4	New Castle	Piedmont	Red Clay Creek	103011	10.6667
1980-10-01	Qtr4	New Castle	Piedmont	Red Clay Creek	103031	10.6667
1980-10-01	Qtr4	New Castle	Piedmont	White Clay Creek	105031	12.3333
1980-10-01	Qtr4	New Castle	Piedmont	Christina River	106021	10.3333
1980-10-01	Qtr4	New Castle	Delaware Bay	Red Lion Creek	107011	9
1980-10-01	Qtr4	New Castle	Delaware Bay	Red Lion Creek	107031	7
1980-10-01	Qtr4	New Castle	Chesapeake Bay	Chesapeake and Delaware Canal	108021	7
1980-10-01	Qtr4	New Castle	Delaware Bay	Appoquinimink River	109041	0
1980-10-01	Qtr4	New Castle	Delaware Bay	Blackbird Creek	110041	0
1980-10-01	Qtr4	New Castle	Delaware Bay	Dragon Creek	111031	6
1981-01-01	Qtr1	Sussex	Delaware Bay	Cedar Creek	301021	4
1981-01-01	Qtr1	Sussex	Delaware Bay	Cedar Creek	301031	2
1981-01-01	Qtr1	Sussex	Delaware Bay	Broadkill River	303021	2.66667
1981-01-01	Qtr1	Sussex	Inland Bays	Lewes-Rehoboth Canal	305011	5
1981-01-01	Qtr1	Sussex	Inland Bays	Lewes-Rehoboth Canal	305041	2.66667
1981-01-01	Qtr1	Sussex	Chesapeake Bay	Broad Creek	307031	5.5
1981-01-01	Qtr1	Sussex	Inland Bays	Rehoboth Bay	308031	5
1981-01-01	Qtr1	Sussex	Inland Bays	Iron Branch	309041	9
1981-01-01	Qtr1	Sussex	Inland Bays	Buntings Branch	311041	8
1981-01-01	Qtr1	New Castle	Piedmont	Red Clay Creek	103011	3.33333
1981-01-01	Qtr1	New Castle	Piedmont	Red Clay Creek	103031	3.66667
1981-01-01	Qtr1	New Castle	Piedmont	White Clay Creek	105031	8
1981-01-01	Qtr1	New Castle	Piedmont	Christina River	106021	4.5
1981-01-01	Qtr1	New Castle	Delaware Bay	Red Lion Creek	107011	5
1981-01-01	Qtr1	New Castle	Delaware Bay	Red Lion Creek	107031	6
1981-01-01	Qtr1	New Castle	Chesapeake Bay	Chesapeake and Delaware Canal	108021	3.5
1981-01-01	Qtr1	New Castle	Delaware Bay	Appoquinimink River	109041	9
1981-01-01	Qtr1	New Castle	Delaware Bay	Appoquinimink River	109071	9
1981-01-01	Qtr1	New Castle	Delaware Bay	Blackbird Creek	110041	9
1981-01-01	Qtr1	New Castle	Delaware Bay	Dragon Creek	111031	4.5
1981-04-01	Qtr2	Sussex	Delaware Bay	Cedar Creek	301021	21.3333
1981-04-01	Qtr2	Sussex	Delaware Bay	Cedar Creek	301031	21.6667
1981-04-01	Qtr2	Sussex	Delaware Bay	Broadkill River	303021	15
1981-04-01	Qtr2	Sussex	Delaware Bay	Broadkill River	303061	18.5
1981-04-01	Qtr2	Sussex	Inland Bays	Lewes-Rehoboth Canal	305011	17
1981-04-01	Qtr2	Sussex	Inland Bays	Lewes-Rehoboth Canal	305041	16.6667
1981-04-01	Qtr2	Sussex	Inland Bays	Rehoboth Bay	306091	17.5
1981-04-01	Qtr2	Sussex	Inland Bays	Indian River Bay	306111	16
1981-04-01	Qtr2	Sussex	Inland Bays	Indian River Bay	306121	16
1981-04-01	Qtr2	Sussex	Inland Bays	Indian River	306181	20
1981-04-01	Qtr2	Sussex	Chesapeake Bay	Broad Creek	307031	28
1981-04-01	Qtr2	Sussex	Inland Bays	Rehoboth Bay	308031	18
1981-04-01	Qtr2	Sussex	Inland Bays	Iron Branch	309041	17
1981-04-01	Qtr2	Sussex	Inland Bays	Buntings Branch	311041	18
1981-04-01	Qtr2	New Castle	Piedmont	Red Clay Creek	103011	18.875
1981-04-01	Qtr2	New Castle	Piedmont	Red Clay Creek	103031	18.375
1981-04-01	Qtr2	New Castle	Piedmont	White Clay Creek	105031	16.3333
1981-04-01	Qtr2	New Castle	Piedmont	Christina River	106021	17.6667
1981-04-01	Qtr2	New Castle	Delaware Bay	Red Lion Creek	107011	19.25
1981-04-01	Qtr2	New Castle	Delaware Bay	Red Lion Creek	107031	19.75
1981-04-01	Qtr2	New Castle	Chesapeake Bay	Chesapeake and Delaware Canal	108021	18.5
1981-04-01	Qtr2	New Castle	Delaware Bay	Appoquinimink River	109041	20
1981-04-01	Qtr2	New Castle	Delaware Bay	Appoquinimink River	109071	20
1981-04-01	Qtr2	New Castle	Delaware Bay	Blackbird Creek	110041	24
1981-04-01	Qtr2	New Castle	Delaware Bay	Dragon Creek	111031	19
1981-07-01	Qtr3	Sussex	Delaware Bay	Cedar Creek	301021	23
1981-07-01	Qtr3	Sussex	Delaware Bay	Cedar Creek	301031	21
1981-07-01	Qtr3	Sussex	Delaware Bay	Broadkill River	303061	24
1981-07-01	Qtr3	Sussex	Inland Bays	Lewes-Rehoboth Canal	305011	21.5
1981-07-01	Qtr3	Sussex	Inland Bays	Lewes-Rehoboth Canal	305041	20.6667
1981-07-01	Qtr3	Sussex	Inland Bays	Rehoboth Bay	306091	22
1981-07-01	Qtr3	Sussex	Inland Bays	Indian River Bay	306111	21.1667
1981-07-01	Qtr3	Sussex	Inland Bays	Indian River Bay	306121	21.25
1981-07-01	Qtr3	Sussex	Inland Bays	Indian River	306181	22.5
1981-07-01	Qtr3	Sussex	Chesapeake Bay	Broad Creek	307031	20.3333
1981-07-01	Qtr3	Sussex	Inland Bays	Iron Branch	309041	21
1981-07-01	Qtr3	Sussex	Inland Bays	Buntings Branch	311041	22
1981-07-01	Qtr3	New Castle	Piedmont	Red Clay Creek	103011	21.75
1981-07-01	Qtr3	New Castle	Piedmont	Red Clay Creek	103031	21.5
1981-07-01	Qtr3	New Castle	Piedmont	White Clay Creek	105031	20.6667
1981-07-01	Qtr3	New Castle	Piedmont	Christina River	106021	22.3333
1981-07-01	Qtr3	New Castle	Delaware Bay	Red Lion Creek	107011	21
1981-07-01	Qtr3	New Castle	Delaware Bay	Red Lion Creek	107031	24.6667
1981-07-01	Qtr3	New Castle	Chesapeake Bay	Chesapeake and Delaware Canal	108021	24
1981-07-01	Qtr3	New Castle	Delaware Bay	Appoquinimink River	109041	24
1981-07-01	Qtr3	New Castle	Delaware Bay	Appoquinimink River	109071	23.5
1981-07-01	Qtr3	New Castle	Delaware Bay	Blackbird Creek	110041	23.6667
1981-07-01	Qtr3	New Castle	Delaware Bay	Dragon Creek	111031	17.5
1981-10-01	Qtr4	Sussex	Delaware Bay	Broadkill River	303021	9
1981-10-01	Qtr4	Sussex	Delaware Bay	Broadkill River	303061	13
1981-10-01	Qtr4	Sussex	Inland Bays	Lewes-Rehoboth Canal	305011	7.33333
1981-10-01	Qtr4	Sussex	Inland Bays	Lewes-Rehoboth Canal	305041	7.66667
1981-10-01	Qtr4	Sussex	Inland Bays	Rehoboth Bay	306091	10
1981-10-01	Qtr4	Sussex	Inland Bays	Indian River Bay	306111	10.5
1981-10-01	Qtr4	Sussex	Inland Bays	Indian River Bay	306121	10
1981-10-01	Qtr4	Sussex	Inland Bays	Indian River	306181	11.5
1981-10-01	Qtr4	Sussex	Chesapeake Bay	Broad Creek	307031	7
1981-10-01	Qtr4	Sussex	Inland Bays	Rehoboth Bay	308031	2
1981-10-01	Qtr4	Sussex	Inland Bays	Little Assawoman Bay	310011	11
1981-10-01	Qtr4	Sussex	Inland Bays	Buntings Branch	311041	6
1981-10-01	Qtr4	New Castle	Piedmont	Red Clay Creek	103011	6
1981-10-01	Qtr4	New Castle	Piedmont	Red Clay Creek	103031	6.66667
1981-10-01	Qtr4	New Castle	Piedmont	White Clay Creek	105031	6.83333
1981-10-01	Qtr4	New Castle	Piedmont	Christina River	106021	6.66667
1981-10-01	Qtr4	New Castle	Delaware Bay	Red Lion Creek	107011	7.5
1981-10-01	Qtr4	New Castle	Delaware Bay	Red Lion Creek	107031	9
1981-10-01	Qtr4	New Castle	Chesapeake Bay	Chesapeake and Delaware Canal	108021	13
1981-10-01	Qtr4	New Castle	Delaware Bay	Appoquinimink River	109131	12.5
1981-10-01	Qtr4	New Castle	Delaware Bay	Dragon Creek	111031	7
1982-01-01	Qtr1	Sussex	Delaware Bay	Cedar Creek	301021	10
1982-01-01	Qtr1	Sussex	Delaware Bay	Cedar Creek	301031	10
1982-01-01	Qtr1	Sussex	Delaware Bay	Broadkill River	303021	3.5
1982-01-01	Qtr1	Sussex	Delaware Bay	Broadkill River	303061	6
1982-01-01	Qtr1	Sussex	Inland Bays	Lewes-Rehoboth Canal	305011	7.5
1982-01-01	Qtr1	Sussex	Inland Bays	Lewes-Rehoboth Canal	305041	7
1982-01-01	Qtr1	Sussex	Inland Bays	Rehoboth Bay	308031	6
1982-01-01	Qtr1	Sussex	Inland Bays	Iron Branch	309041	11
1982-01-01	Qtr1	Sussex	Inland Bays	Buntings Branch	311041	3
1982-01-01	Qtr1	New Castle	Piedmont	Red Clay Creek	103011	3.66667
1982-01-01	Qtr1	New Castle	Piedmont	Red Clay Creek	103031	3.66667
1982-01-01	Qtr1	New Castle	Piedmont	White Clay Creek	105031	4.625
1982-01-01	Qtr1	New Castle	Delaware Bay	Red Lion Creek	107011	0
1982-01-01	Qtr1	New Castle	Delaware Bay	Red Lion Creek	107031	0
1982-01-01	Qtr1	New Castle	Chesapeake Bay	Chesapeake and Delaware Canal	108021	5
1982-01-01	Qtr1	New Castle	Delaware Bay	Dragon Creek	111031	10
1982-04-01	Qtr2	Sussex	Delaware Bay	Cedar Creek	301021	24
1982-04-01	Qtr2	Sussex	Delaware Bay	Cedar Creek	301031	20
1982-04-01	Qtr2	Sussex	Delaware Bay	Broadkill River	303061	17.8333
1982-04-01	Qtr2	Sussex	Inland Bays	Lewes-Rehoboth Canal	305011	18.3333
1982-04-01	Qtr2	Sussex	Inland Bays	Lewes-Rehoboth Canal	305041	17.3333
1982-04-01	Qtr2	Sussex	Inland Bays	Rehoboth Bay	306091	18.5
1982-04-01	Qtr2	Sussex	Inland Bays	Indian River Bay	306111	17
1982-04-01	Qtr2	Sussex	Inland Bays	Indian River Bay	306121	16.5
1982-04-01	Qtr2	Sussex	Inland Bays	Indian River	306181	21.5
1982-04-01	Qtr2	Sussex	Inland Bays	Rehoboth Bay	308031	17
1982-04-01	Qtr2	Sussex	Inland Bays	Little Assawoman Bay	310011	19
1982-04-01	Qtr2	Sussex	Inland Bays	Buntings Branch	311041	15
1982-04-01	Qtr2	New Castle	Piedmont	Red Clay Creek	103011	13
1982-04-01	Qtr2	New Castle	Piedmont	Red Clay Creek	103031	13
1982-04-01	Qtr2	New Castle	Piedmont	White Clay Creek	105031	14.375
1982-04-01	Qtr2	New Castle	Delaware Bay	Red Lion Creek	107011	12.5
1982-04-01	Qtr2	New Castle	Delaware Bay	Red Lion Creek	107031	12.5
1982-04-01	Qtr2	New Castle	Delaware Bay	Dragon Creek	111031	13
1982-07-01	Qtr3	Sussex	Delaware Bay	Cedar Creek	301021	24.3333
1982-07-01	Qtr3	Sussex	Delaware Bay	Cedar Creek	301031	24
1982-07-01	Qtr3	Sussex	Delaware Bay	Broadkill River	303061	24
1982-07-01	Qtr3	Sussex	Inland Bays	Lewes-Rehoboth Canal	305011	24
1982-07-01	Qtr3	Sussex	Inland Bays	Lewes-Rehoboth Canal	305041	23.3333
1982-07-01	Qtr3	Sussex	Inland Bays	Rehoboth Bay	306091	24
1982-07-01	Qtr3	Sussex	Inland Bays	Indian River Bay	306111	24
1982-07-01	Qtr3	Sussex	Inland Bays	Indian River Bay	306121	24
1982-07-01	Qtr3	Sussex	Inland Bays	Indian River	306181	25.5
1982-07-01	Qtr3	Sussex	Inland Bays	Rehoboth Bay	308031	21
1982-07-01	Qtr3	Sussex	Inland Bays	Little Assawoman Bay	310011	21
1982-07-01	Qtr3	New Castle	Piedmont	Red Clay Creek	103011	20.6667
1982-07-01	Qtr3	New Castle	Piedmont	Red Clay Creek	103031	20.8333
1982-07-01	Qtr3	New Castle	Piedmont	White Clay Creek	105031	20
1982-07-01	Qtr3	New Castle	Delaware Bay	Red Lion Creek	107011	20
1982-07-01	Qtr3	New Castle	Delaware Bay	Red Lion Creek	107031	20
1982-07-01	Qtr3	New Castle	Chesapeake Bay	Chesapeake and Delaware Canal	108021	24
1982-10-01	Qtr4	Sussex	Delaware Bay	Cedar Creek	301021	14.3333
1982-10-01	Qtr4	Sussex	Delaware Bay	Cedar Creek	301031	14.1667
1982-10-01	Qtr4	Sussex	Inland Bays	Lewes-Rehoboth Canal	305011	10.8333
1982-10-01	Qtr4	Sussex	Inland Bays	Lewes-Rehoboth Canal	305041	11.3333
1982-10-01	Qtr4	Sussex	Inland Bays	Rehoboth Bay	306091	19
1982-10-01	Qtr4	Sussex	Inland Bays	Indian River Bay	306111	19
1982-10-01	Qtr4	Sussex	Inland Bays	Indian River Bay	306121	19
1982-10-01	Qtr4	Sussex	Inland Bays	Indian River	306181	20
1982-10-01	Qtr4	Sussex	Inland Bays	Rehoboth Bay	308031	9
1982-10-01	Qtr4	Sussex	Inland Bays	Little Assawoman Bay	310011	14
1982-10-01	Qtr4	Sussex	Inland Bays	Buntings Branch	311041	11.25
1982-10-01	Qtr4	New Castle	Piedmont	Red Clay Creek	103011	15
1982-10-01	Qtr4	New Castle	Piedmont	Red Clay Creek	103031	9
1982-10-01	Qtr4	New Castle	Piedmont	White Clay Creek	105031	13.6667
1982-10-01	Qtr4	New Castle	Delaware Bay	Red Lion Creek	107011	6
1982-10-01	Qtr4	New Castle	Delaware Bay	Red Lion Creek	107031	6
1982-10-01	Qtr4	New Castle	Chesapeake Bay	Chesapeake and Delaware Canal	108021	20.5
1982-10-01	Qtr4	New Castle	Delaware Bay	Dragon Creek	111031	7.66667
1983-01-01	Qtr1	Sussex	Delaware Bay	Cedar Creek	301021	4
1983-01-01	Qtr1	Sussex	Delaware Bay	Cedar Creek	301031	4
1983-01-01	Qtr1	Sussex	Inland Bays	Lewes-Rehoboth Canal	305011	8
1983-01-01	Qtr1	Sussex	Inland Bays	Lewes-Rehoboth Canal	305041	8
1983-01-01	Qtr1	Sussex	Chesapeake Bay	Broad Creek	307031	5
1983-01-01	Qtr1	Sussex	Inland Bays	Iron Branch	309041	10.5
1983-01-01	Qtr1	Sussex	Inland Bays	Little Assawoman Bay	310011	9
1983-01-01	Qtr1	Sussex	Inland Bays	Buntings Branch	311041	6.5
1983-01-01	Qtr1	New Castle	Piedmont	Red Clay Creek	103011	4
1983-01-01	Qtr1	New Castle	Piedmont	Red Clay Creek	103031	4.33333
1983-01-01	Qtr1	New Castle	Piedmont	White Clay Creek	105031	3.33333
1983-01-01	Qtr1	New Castle	Piedmont	Christina River	106021	5
1983-01-01	Qtr1	New Castle	Delaware Bay	Red Lion Creek	107011	4.5
1983-01-01	Qtr1	New Castle	Delaware Bay	Red Lion Creek	107031	5.5
1983-01-01	Qtr1	New Castle	Chesapeake Bay	Chesapeake and Delaware Canal	108021	2
1983-01-01	Qtr1	New Castle	Delaware Bay	Appoquinimink River	109071	2
1983-01-01	Qtr1	New Castle	Delaware Bay	Dragon Creek	111031	6
1983-04-01	Qtr2	Sussex	Delaware Bay	Cedar Creek	301021	21
1983-04-01	Qtr2	Sussex	Delaware Bay	Cedar Creek	301031	21
1983-04-01	Qtr2	Sussex	Inland Bays	Lewes-Rehoboth Canal	305011	18
1983-04-01	Qtr2	Sussex	Inland Bays	Lewes-Rehoboth Canal	305041	16
1983-04-01	Qtr2	Sussex	Inland Bays	Rehoboth Bay	306091	25
1983-04-01	Qtr2	Sussex	Inland Bays	Indian River Bay	306111	18
1983-04-01	Qtr2	Sussex	Inland Bays	Indian River Bay	306121	19.5
1983-04-01	Qtr2	Sussex	Inland Bays	Indian River	306181	24
1983-04-01	Qtr2	Sussex	Chesapeake Bay	Broad Creek	307031	20.5
1983-04-01	Qtr2	Sussex	Inland Bays	Rehoboth Bay	308031	12
1983-04-01	Qtr2	Sussex	Inland Bays	Iron Branch	309041	20
1983-04-01	Qtr2	Sussex	Inland Bays	Little Assawoman Bay	310011	21.3333
1983-04-01	Qtr2	New Castle	Piedmont	Red Clay Creek	103011	15.3333
1983-04-01	Qtr2	New Castle	Piedmont	Red Clay Creek	103031	15.25
1983-04-01	Qtr2	New Castle	Piedmont	White Clay Creek	105031	12.5
1983-04-01	Qtr2	New Castle	Piedmont	Christina River	106021	17.6667
1983-04-01	Qtr2	New Castle	Delaware Bay	Red Lion Creek	107011	14
1983-04-01	Qtr2	New Castle	Delaware Bay	Red Lion Creek	107031	18
1983-04-01	Qtr2	New Castle	Chesapeake Bay	Chesapeake and Delaware Canal	108021	17.5
1983-04-01	Qtr2	New Castle	Delaware Bay	Appoquinimink River	109071	15.5
1983-04-01	Qtr2	New Castle	Delaware Bay	Appoquinimink River	109131	20
1983-04-01	Qtr2	New Castle	Delaware Bay	Dragon Creek	111031	14
1983-07-01	Qtr3	Sussex	Delaware Bay	Cedar Creek	301021	24
1983-07-01	Qtr3	Sussex	Inland Bays	Lewes-Rehoboth Canal	305011	24
1983-07-01	Qtr3	Sussex	Inland Bays	Lewes-Rehoboth Canal	305041	23
1983-07-01	Qtr3	Sussex	Inland Bays	Rehoboth Bay	306091	23.7333
1983-07-01	Qtr3	Sussex	Inland Bays	Indian River Bay	306111	21.5667
1983-07-01	Qtr3	Sussex	Inland Bays	Indian River Bay	306121	22.8333
1983-07-01	Qtr3	Sussex	Inland Bays	Indian River	306181	24.1333
1983-07-01	Qtr3	Sussex	Chesapeake Bay	Broad Creek	307031	24.5
1983-07-01	Qtr3	Sussex	Inland Bays	Buntings Branch	311041	25
1983-07-01	Qtr3	New Castle	Piedmont	Red Clay Creek	103011	24
1983-07-01	Qtr3	New Castle	Piedmont	Red Clay Creek	103031	23.6667
1983-07-01	Qtr3	New Castle	Piedmont	White Clay Creek	105031	19.3333
1983-07-01	Qtr3	New Castle	Piedmont	Christina River	106021	25
1983-07-01	Qtr3	New Castle	Delaware Bay	Red Lion Creek	107011	21.5
1983-07-01	Qtr3	New Castle	Delaware Bay	Red Lion Creek	107031	25
1983-07-01	Qtr3	New Castle	Chesapeake Bay	Chesapeake and Delaware Canal	108021	23
1983-07-01	Qtr3	New Castle	Delaware Bay	Appoquinimink River	109071	26.5
1983-07-01	Qtr3	New Castle	Delaware Bay	Appoquinimink River	109131	26.5
1983-07-01	Qtr3	New Castle	Delaware Bay	Dragon Creek	111031	19
1983-10-01	Qtr4	Sussex	Delaware Bay	Cedar Creek	301021	8
1983-10-01	Qtr4	Sussex	Inland Bays	Lewes-Rehoboth Canal	305011	17
1983-10-01	Qtr4	Sussex	Inland Bays	Lewes-Rehoboth Canal	305041	17
1983-10-01	Qtr4	Sussex	Inland Bays	Rehoboth Bay	306091	16
1983-10-01	Qtr4	Sussex	Inland Bays	Indian River Bay	306111	17
1983-10-01	Qtr4	Sussex	Inland Bays	Indian River Bay	306121	16
1983-10-01	Qtr4	Sussex	Inland Bays	Indian River	306181	18
1983-10-01	Qtr4	Sussex	Chesapeake Bay	Broad Creek	307031	6
1983-10-01	Qtr4	Sussex	Inland Bays	Iron Branch	309041	8
1983-10-01	Qtr4	Sussex	Inland Bays	Little Assawoman Bay	310011	11.5
1983-10-01	Qtr4	Sussex	Inland Bays	Buntings Branch	311041	11.5
1983-10-01	Qtr4	New Castle	Piedmont	Red Clay Creek	103011	10
1983-10-01	Qtr4	New Castle	Piedmont	Red Clay Creek	103031	10
1983-10-01	Qtr4	New Castle	Piedmont	White Clay Creek	105031	6
1983-10-01	Qtr4	New Castle	Piedmont	Christina River	106021	13
1983-10-01	Qtr4	New Castle	Delaware Bay	Red Lion Creek	107011	10.25
1983-10-01	Qtr4	New Castle	Delaware Bay	Red Lion Creek	107031	10.75
1983-10-01	Qtr4	New Castle	Delaware Bay	Appoquinimink River	109071	9.5
1983-10-01	Qtr4	New Castle	Delaware Bay	Appoquinimink River	109131	10.5
1983-10-01	Qtr4	New Castle	Delaware Bay	Dragon Creek	111031	14
1984-01-01	Qtr1	Sussex	Delaware Bay	Cedar Creek	301021	8
1984-01-01	Qtr1	Sussex	Inland Bays	Lewes-Rehoboth Canal	305011	4.75
1984-01-01	Qtr1	Sussex	Inland Bays	Lewes-Rehoboth Canal	305041	3
1984-01-01	Qtr1	Sussex	Inland Bays	Rehoboth Bay	306091	2
1984-01-01	Qtr1	Sussex	Inland Bays	Indian River Bay	306111	3.25
1984-01-01	Qtr1	Sussex	Inland Bays	Indian River Bay	306121	2
1984-01-01	Qtr1	Sussex	Inland Bays	Indian River	306181	4
1984-01-01	Qtr1	Sussex	Chesapeake Bay	Broad Creek	307031	1.5
1984-01-01	Qtr1	Sussex	Inland Bays	Rehoboth Bay	308031	4
1984-01-01	Qtr1	Sussex	Inland Bays	Iron Branch	309041	8
1984-01-01	Qtr1	Sussex	Inland Bays	Little Assawoman Bay	310011	6
1984-01-01	Qtr1	Sussex	Inland Bays	Buntings Branch	311041	4
1984-01-01	Qtr1	New Castle	Piedmont	Red Clay Creek	103011	0.666667
1984-01-01	Qtr1	New Castle	Piedmont	Red Clay Creek	103031	1
1984-01-01	Qtr1	New Castle	Piedmont	White Clay Creek	105031	1
1984-01-01	Qtr1	New Castle	Piedmont	Christina River	106021	1
1984-01-01	Qtr1	New Castle	Delaware Bay	Red Lion Creek	107011	1
1984-01-01	Qtr1	New Castle	Delaware Bay	Red Lion Creek	107031	0
1984-01-01	Qtr1	New Castle	Delaware Bay	Dragon Creek	111031	1
1984-04-01	Qtr2	Sussex	Delaware Bay	Cedar Creek	301021	11
1984-04-01	Qtr2	Sussex	Delaware Bay	Broadkill River	303061	16
1984-04-01	Qtr2	Sussex	Inland Bays	Lewes-Rehoboth Canal	305011	17.3333
1984-04-01	Qtr2	Sussex	Inland Bays	Lewes-Rehoboth Canal	305041	17.3333
1984-04-01	Qtr2	Sussex	Inland Bays	Rehoboth Bay	306091	20.5
1984-04-01	Qtr2	Sussex	Inland Bays	Indian River Bay	306111	16.3333
1984-04-01	Qtr2	Sussex	Inland Bays	Indian River Bay	306121	21
1984-04-01	Qtr2	Sussex	Inland Bays	Indian River	306181	22
1984-04-01	Qtr2	Sussex	Chesapeake Bay	Broad Creek	307031	12
1984-04-01	Qtr2	Sussex	Inland Bays	Rehoboth Bay	308031	12
1984-04-01	Qtr2	Sussex	Inland Bays	Little Assawoman Bay	310011	15
1984-04-01	Qtr2	New Castle	Piedmont	Red Clay Creek	103011	15.3333
1984-04-01	Qtr2	New Castle	Piedmont	Red Clay Creek	103031	15
1984-04-01	Qtr2	New Castle	Piedmont	White Clay Creek	105031	14.4
1984-04-01	Qtr2	New Castle	Piedmont	Christina River	106021	14
1984-04-01	Qtr2	New Castle	Delaware Bay	Red Lion Creek	107011	17.5
1984-04-01	Qtr2	New Castle	Delaware Bay	Red Lion Creek	107031	19.5
1984-04-01	Qtr2	New Castle	Chesapeake Bay	Chesapeake and Delaware Canal	108021	17
1984-04-01	Qtr2	New Castle	Delaware Bay	Dragon Creek	111031	18.5
1984-07-01	Qtr3	Sussex	Delaware Bay	Cedar Creek	301021	23
1984-07-01	Qtr3	Sussex	Inland Bays	Lewes-Rehoboth Canal	305011	23.5
1984-07-01	Qtr3	Sussex	Inland Bays	Lewes-Rehoboth Canal	305041	23.1
1984-07-01	Qtr3	Sussex	Inland Bays	Rehoboth Bay	306091	22.15
1984-07-01	Qtr3	Sussex	Inland Bays	Indian River Bay	306111	21.55
1984-07-01	Qtr3	Sussex	Inland Bays	Indian River Bay	306121	21.4444
1984-07-01	Qtr3	Sussex	Inland Bays	Indian River	306181	24.65
1984-07-01	Qtr3	Sussex	Chesapeake Bay	Broad Creek	307031	23.75
1984-07-01	Qtr3	New Castle	Piedmont	Red Clay Creek	103011	20.6667
1984-07-01	Qtr3	New Castle	Piedmont	Red Clay Creek	103031	21.3333
1984-07-01	Qtr3	New Castle	Piedmont	White Clay Creek	105031	20.6667
1984-07-01	Qtr3	New Castle	Piedmont	Christina River	106021	25
1984-07-01	Qtr3	New Castle	Delaware Bay	Red Lion Creek	107011	19
1984-07-01	Qtr3	New Castle	Delaware Bay	Red Lion Creek	107031	24.5
1984-07-01	Qtr3	New Castle	Delaware Bay	Dragon Creek	111031	18.5
1984-10-01	Qtr4	Sussex	Delaware Bay	Cedar Creek	301021	22
1984-10-01	Qtr4	Sussex	Delaware Bay	Cedar Creek	301031	22
1984-10-01	Qtr4	Sussex	Inland Bays	Lewes-Rehoboth Canal	305011	16.6667
1984-10-01	Qtr4	Sussex	Inland Bays	Lewes-Rehoboth Canal	305041	16
1984-10-01	Qtr4	Sussex	Inland Bays	Rehoboth Bay	306091	20
1984-10-01	Qtr4	Sussex	Inland Bays	Indian River Bay	306111	15.3333
1984-10-01	Qtr4	Sussex	Inland Bays	Indian River Bay	306121	20
1984-10-01	Qtr4	Sussex	Inland Bays	Indian River	306181	23
1984-10-01	Qtr4	Sussex	Chesapeake Bay	Broad Creek	307031	12.6667
1984-10-01	Qtr4	Sussex	Inland Bays	Rehoboth Bay	308031	14
1984-10-01	Qtr4	Sussex	Inland Bays	Iron Branch	309041	12
1984-10-01	Qtr4	Sussex	Inland Bays	Little Assawoman Bay	310011	9
1984-10-01	Qtr4	Sussex	Inland Bays	Buntings Branch	311041	13
1984-10-01	Qtr4	New Castle	Piedmont	Red Clay Creek	103011	11.6667
1984-10-01	Qtr4	New Castle	Piedmont	Red Clay Creek	103031	11
1984-10-01	Qtr4	New Castle	Piedmont	White Clay Creek	105031	11
1984-10-01	Qtr4	New Castle	Piedmont	Christina River	106021	12
1984-10-01	Qtr4	New Castle	Delaware Bay	Red Lion Creek	107011	10.5
1984-10-01	Qtr4	New Castle	Delaware Bay	Red Lion Creek	107031	14.5
1984-10-01	Qtr4	New Castle	Chesapeake Bay	Chesapeake and Delaware Canal	108021	19
1984-10-01	Qtr4	New Castle	Delaware Bay	Appoquinimink River	109041	7
1984-10-01	Qtr4	New Castle	Delaware Bay	Appoquinimink River	109071	12
1984-10-01	Qtr4	New Castle	Delaware Bay	Dragon Creek	111031	9.5
1985-01-01	Qtr1	Sussex	Inland Bays	Lewes-Rehoboth Canal	305011	1.5
1985-01-01	Qtr1	Sussex	Inland Bays	Lewes-Rehoboth Canal	305041	1
1985-01-01	Qtr1	Sussex	Inland Bays	Indian River Bay	306111	1.5
1985-01-01	Qtr1	Sussex	Chesapeake Bay	Broad Creek	307031	13
1985-01-01	Qtr1	Sussex	Inland Bays	Iron Branch	309041	9
1985-01-01	Qtr1	Sussex	Inland Bays	Little Assawoman Bay	310011	10
1985-01-01	Qtr1	Sussex	Inland Bays	Buntings Branch	311041	12
1985-01-01	Qtr1	New Castle	Piedmont	Red Clay Creek	103011	3.66667
1985-01-01	Qtr1	New Castle	Piedmont	Red Clay Creek	103031	5
1985-01-01	Qtr1	New Castle	Piedmont	White Clay Creek	105031	3.5
1985-01-01	Qtr1	New Castle	Piedmont	Christina River	106021	7.25
1985-01-01	Qtr1	New Castle	Delaware Bay	Red Lion Creek	107011	2.5
1985-01-01	Qtr1	New Castle	Delaware Bay	Red Lion Creek	107031	4.5
1985-01-01	Qtr1	New Castle	Chesapeake Bay	Chesapeake and Delaware Canal	108021	9
1985-01-01	Qtr1	New Castle	Delaware Bay	Dragon Creek	111031	4
1985-04-01	Qtr2	Sussex	Delaware Bay	Cedar Creek	301021	20.5
1985-04-01	Qtr2	Sussex	Delaware Bay	Broadkill River	303021	17.5
1985-04-01	Qtr2	Sussex	Inland Bays	Lewes-Rehoboth Canal	305011	24
1985-04-01	Qtr2	Sussex	Inland Bays	Lewes-Rehoboth Canal	305041	22.75
1985-04-01	Qtr2	Sussex	Inland Bays	Rehoboth Bay	306091	22.5
1985-04-01	Qtr2	Sussex	Inland Bays	Indian River Bay	306111	22
1985-04-01	Qtr2	Sussex	Inland Bays	Indian River Bay	306121	23.5
1985-04-01	Qtr2	Sussex	Inland Bays	Indian River	306181	25.25
1985-04-01	Qtr2	Sussex	Chesapeake Bay	Broad Creek	307031	21
1985-04-01	Qtr2	Sussex	Inland Bays	Little Assawoman Bay	310011	20
1985-04-01	Qtr2	Sussex	Inland Bays	Buntings Branch	311041	19
1985-04-01	Qtr2	New Castle	Piedmont	Red Clay Creek	103011	17.1667
1985-04-01	Qtr2	New Castle	Piedmont	Red Clay Creek	103031	16.5
1985-04-01	Qtr2	New Castle	Piedmont	White Clay Creek	105031	18.6667
1985-04-01	Qtr2	New Castle	Piedmont	Christina River	106021	18.6667
1985-04-01	Qtr2	New Castle	Delaware Bay	Red Lion Creek	107011	16
1985-04-01	Qtr2	New Castle	Delaware Bay	Red Lion Creek	107031	16
1985-04-01	Qtr2	New Castle	Chesapeake Bay	Chesapeake and Delaware Canal	108021	24
1985-04-01	Qtr2	New Castle	Delaware Bay	Appoquinimink River	109041	21
1985-04-01	Qtr2	New Castle	Delaware Bay	Appoquinimink River	109071	21
1985-04-01	Qtr2	New Castle	Delaware Bay	Appoquinimink River	109131	23
1985-04-01	Qtr2	New Castle	Delaware Bay	Dragon Creek	111031	14
1985-07-01	Qtr3	Sussex	Delaware Bay	Cedar Creek	301021	28
1985-07-01	Qtr3	Sussex	Inland Bays	Lewes-Rehoboth Canal	305011	24.5
1985-07-01	Qtr3	Sussex	Inland Bays	Lewes-Rehoboth Canal	305041	24
1985-07-01	Qtr3	Sussex	Inland Bays	Rehoboth Bay	306091	28
1985-07-01	Qtr3	Sussex	Inland Bays	Indian River Bay	306111	23.5
1985-07-01	Qtr3	Sussex	Inland Bays	Indian River Bay	306121	29
1985-07-01	Qtr3	Sussex	Inland Bays	Indian River	306181	29
1985-07-01	Qtr3	Sussex	Chesapeake Bay	Broad Creek	307031	26
1985-07-01	Qtr3	Sussex	Inland Bays	Rehoboth Bay	308031	22
1985-07-01	Qtr3	Sussex	Inland Bays	Little Assawoman Bay	310011	25
1985-07-01	Qtr3	Sussex	Inland Bays	Buntings Branch	311041	21
1985-07-01	Qtr3	New Castle	Piedmont	Red Clay Creek	103011	21.3333
1985-07-01	Qtr3	New Castle	Piedmont	Red Clay Creek	103031	20.6667
1985-07-01	Qtr3	New Castle	Piedmont	White Clay Creek	105031	20.75
1985-07-01	Qtr3	New Castle	Piedmont	Christina River	106021	26.3333
1985-07-01	Qtr3	New Castle	Delaware Bay	Red Lion Creek	107011	17.5
1985-07-01	Qtr3	New Castle	Delaware Bay	Red Lion Creek	107031	22.5
1985-07-01	Qtr3	New Castle	Chesapeake Bay	Chesapeake and Delaware Canal	108021	26
1985-07-01	Qtr3	New Castle	Delaware Bay	Dragon Creek	111031	16
1985-10-01	Qtr4	Sussex	Inland Bays	Lewes-Rehoboth Canal	305011	11.75
1985-10-01	Qtr4	Sussex	Inland Bays	Lewes-Rehoboth Canal	305041	12.25
1985-10-01	Qtr4	Sussex	Inland Bays	Rehoboth Bay	306091	19
1985-10-01	Qtr4	Sussex	Inland Bays	Indian River Bay	306111	18.5
1985-10-01	Qtr4	Sussex	Inland Bays	Indian River Bay	306121	18
1985-10-01	Qtr4	Sussex	Inland Bays	Indian River	306181	18
1985-10-01	Qtr4	Sussex	Inland Bays	Rehoboth Bay	308031	5
1985-10-01	Qtr4	New Castle	Piedmont	Red Clay Creek	103011	11.3333
1985-10-01	Qtr4	New Castle	Piedmont	Red Clay Creek	103031	11.3333
1985-10-01	Qtr4	New Castle	Piedmont	White Clay Creek	105031	9.33333
1985-10-01	Qtr4	New Castle	Piedmont	Christina River	106021	13
1985-10-01	Qtr4	New Castle	Delaware Bay	Red Lion Creek	107011	16.5
1985-10-01	Qtr4	New Castle	Delaware Bay	Red Lion Creek	107031	16.5
1985-10-01	Qtr4	New Castle	Chesapeake Bay	Chesapeake and Delaware Canal	108021	12
1985-10-01	Qtr4	New Castle	Delaware Bay	Dragon Creek	111031	9
1986-01-01	Qtr1	Sussex	Inland Bays	Lewes-Rehoboth Canal	305011	4.66667
1986-01-01	Qtr1	Sussex	Inland Bays	Lewes-Rehoboth Canal	305041	4
1986-01-01	Qtr1	Sussex	Inland Bays	Rehoboth Bay	308031	4.16667
1986-01-01	Qtr1	Sussex	Inland Bays	Iron Branch	309041	5
1986-01-01	Qtr1	Sussex	Inland Bays	Little Assawoman Bay	310011	11
1986-01-01	Qtr1	Sussex	Inland Bays	Buntings Branch	311041	11
1986-04-01	Qtr2	Sussex	Delaware Bay	Cedar Creek	301021	23
1986-04-01	Qtr2	Sussex	Inland Bays	Lewes-Rehoboth Canal	305011	18
1986-04-01	Qtr2	Sussex	Inland Bays	Lewes-Rehoboth Canal	305041	17
1986-04-01	Qtr2	Sussex	Inland Bays	Rehoboth Bay	306091	18.5
1986-04-01	Qtr2	Sussex	Inland Bays	Indian River Bay	306111	17.5
1986-04-01	Qtr2	Sussex	Inland Bays	Indian River Bay	306121	18.5
1986-04-01	Qtr2	Sussex	Inland Bays	Indian River	306181	21
1986-04-01	Qtr2	Sussex	Chesapeake Bay	Broad Creek	307031	19
1986-04-01	Qtr2	Sussex	Inland Bays	Rehoboth Bay	308031	18.5
1986-04-01	Qtr2	Sussex	Inland Bays	Iron Branch	309041	16.75
1986-04-01	Qtr2	Sussex	Inland Bays	Little Assawoman Bay	310011	22
1986-04-01	Qtr2	Sussex	Inland Bays	Buntings Branch	311041	19.5
1986-07-01	Qtr3	Sussex	Inland Bays	Lewes-Rehoboth Canal	305011	25
1986-07-01	Qtr3	Sussex	Inland Bays	Lewes-Rehoboth Canal	305041	25.3333
1986-07-01	Qtr3	Sussex	Inland Bays	Rehoboth Bay	306091	25
1986-07-01	Qtr3	Sussex	Inland Bays	Indian River Bay	306111	24.8333
1986-07-01	Qtr3	Sussex	Inland Bays	Indian River Bay	306121	24.5
1986-07-01	Qtr3	Sussex	Inland Bays	Indian River	306181	25.6667
1986-07-01	Qtr3	Sussex	Chesapeake Bay	Broad Creek	307031	26.25
1986-07-01	Qtr3	Sussex	Inland Bays	Rehoboth Bay	308031	22
1986-07-01	Qtr3	Sussex	Inland Bays	Iron Branch	309041	23
1986-07-01	Qtr3	Sussex	Inland Bays	Little Assawoman Bay	310011	26.25
1986-07-01	Qtr3	Sussex	Inland Bays	Buntings Branch	311041	22.8333
1986-10-01	Qtr4	Sussex	Inland Bays	Lewes-Rehoboth Canal	305011	12
1986-10-01	Qtr4	Sussex	Inland Bays	Lewes-Rehoboth Canal	305041	12
1986-10-01	Qtr4	Sussex	Inland Bays	Indian River Bay	306111	12.5
1986-10-01	Qtr4	Sussex	Chesapeake Bay	Broad Creek	307031	9
1986-10-01	Qtr4	Sussex	Inland Bays	Rehoboth Bay	308031	7
1986-10-01	Qtr4	Sussex	Inland Bays	Iron Branch	309041	6
1987-01-01	Qtr1	Sussex	Inland Bays	Lewes-Rehoboth Canal	305011	7
1987-01-01	Qtr1	Sussex	Inland Bays	Lewes-Rehoboth Canal	305041	6
1987-01-01	Qtr1	Sussex	Inland Bays	Indian River Bay	306111	3
1987-01-01	Qtr1	Sussex	Chesapeake Bay	Broad Creek	307031	6
1987-01-01	Qtr1	Sussex	Inland Bays	Rehoboth Bay	308031	16
1987-01-01	Qtr1	Sussex	Inland Bays	Iron Branch	309041	2
1987-01-01	Qtr1	Sussex	Inland Bays	Little Assawoman Bay	310011	4
1987-01-01	Qtr1	Sussex	Inland Bays	Buntings Branch	311041	4
1987-04-01	Qtr2	Sussex	Delaware Bay	Broadkill River	303331	24.25
1987-04-01	Qtr2	Sussex	Inland Bays	Lewes-Rehoboth Canal	305011	19.3333
1987-04-01	Qtr2	Sussex	Inland Bays	Lewes-Rehoboth Canal	305041	19.3333
1987-04-01	Qtr2	Sussex	Inland Bays	Rehoboth Bay	306091	18
1987-04-01	Qtr2	Sussex	Inland Bays	Indian River Bay	306111	17
1987-04-01	Qtr2	Sussex	Inland Bays	Indian River Bay	306121	21.5
1987-04-01	Qtr2	Sussex	Inland Bays	Indian River	306181	22.5
1987-04-01	Qtr2	Sussex	Chesapeake Bay	Broad Creek	307031	19.1667
1987-04-01	Qtr2	Sussex	Inland Bays	Rehoboth Bay	308031	24
1987-04-01	Qtr2	Sussex	Inland Bays	Iron Branch	309041	16.5
1987-04-01	Qtr2	Sussex	Inland Bays	Little Assawoman Bay	310011	15
1987-04-01	Qtr2	Sussex	Inland Bays	Buntings Branch	311041	16
1987-07-01	Qtr3	Sussex	Delaware Bay	Broadkill River	303331	25.5
1987-07-01	Qtr3	Sussex	Inland Bays	Lewes-Rehoboth Canal	305011	26
1987-07-01	Qtr3	Sussex	Inland Bays	Lewes-Rehoboth Canal	305041	26
1987-07-01	Qtr3	Sussex	Inland Bays	Rehoboth Bay	306091	26
1987-07-01	Qtr3	Sussex	Inland Bays	Indian River Bay	306111	26
1987-07-01	Qtr3	Sussex	Inland Bays	Indian River Bay	306121	26
1987-07-01	Qtr3	Sussex	Inland Bays	Indian River	306181	26
1987-07-01	Qtr3	Sussex	Inland Bays	Little Assawoman Bay	310011	26.75
1987-10-01	Qtr4	Sussex	Delaware Bay	Cedar Creek	301021	13
1987-10-01	Qtr4	Sussex	Delaware Bay	Cedar Creek	301031	13
1987-10-01	Qtr4	Sussex	Inland Bays	Lewes-Rehoboth Canal	305011	12
1987-10-01	Qtr4	Sussex	Inland Bays	Lewes-Rehoboth Canal	305041	12
1987-10-01	Qtr4	Sussex	Inland Bays	Indian River Bay	306111	12
1987-10-01	Qtr4	Sussex	Chesapeake Bay	Broad Creek	307031	5
1987-10-01	Qtr4	Sussex	Inland Bays	Iron Branch	309041	14
1987-10-01	Qtr4	Sussex	Inland Bays	Little Assawoman Bay	310011	13
1987-10-01	Qtr4	Sussex	Inland Bays	Buntings Branch	311041	14
1988-01-01	Qtr1	Sussex	Inland Bays	Lewes-Rehoboth Canal	305011	5.5
1988-01-01	Qtr1	Sussex	Inland Bays	Lewes-Rehoboth Canal	305041	5
1988-01-01	Qtr1	Sussex	Inland Bays	Indian River Bay	306111	8
1988-01-01	Qtr1	Sussex	Chesapeake Bay	Broad Creek	307031	5
1988-01-01	Qtr1	Sussex	Inland Bays	Little Assawoman Bay	310011	5
1988-01-01	Qtr1	Sussex	Inland Bays	Buntings Branch	311041	6
1988-04-01	Qtr2	Sussex	Inland Bays	Lewes-Rehoboth Canal	305011	26
1988-04-01	Qtr2	Sussex	Inland Bays	Lewes-Rehoboth Canal	305041	25.5
1988-04-01	Qtr2	Sussex	Inland Bays	Rehoboth Bay	306091	26
1988-04-01	Qtr2	Sussex	Inland Bays	Indian River Bay	306111	23
1988-04-01	Qtr2	Sussex	Inland Bays	Indian River Bay	306121	23
1988-04-01	Qtr2	Sussex	Inland Bays	Indian River	306181	26
1988-04-01	Qtr2	Sussex	Chesapeake Bay	Broad Creek	307031	14
1988-04-01	Qtr2	Sussex	Inland Bays	Little Assawoman Bay	310011	23
1988-04-01	Qtr2	Sussex	Inland Bays	Buntings Branch	311041	21
1988-07-01	Qtr3	Sussex	Delaware Bay	Cedar Creek	301021	29
1988-07-01	Qtr3	Sussex	Inland Bays	Lewes-Rehoboth Canal	305011	23.6667
1988-07-01	Qtr3	Sussex	Inland Bays	Lewes-Rehoboth Canal	305041	22.3333
1988-07-01	Qtr3	Sussex	Inland Bays	Rehoboth Bay	306091	24.5
1988-07-01	Qtr3	Sussex	Inland Bays	Indian River Bay	306111	21.6667
1988-07-01	Qtr3	Sussex	Inland Bays	Indian River Bay	306121	23.75
1988-07-01	Qtr3	Sussex	Inland Bays	Indian River	306181	24.25
1988-07-01	Qtr3	Sussex	Inland Bays	Rehoboth Bay	308031	23
1988-07-01	Qtr3	Sussex	Inland Bays	Little Assawoman Bay	310011	25
1988-07-01	Qtr3	Sussex	Inland Bays	Buntings Branch	311041	23
1988-10-01	Qtr4	Sussex	Delaware Bay	Cedar Creek	301021	12
1988-10-01	Qtr4	Sussex	Inland Bays	Lewes-Rehoboth Canal	305011	8
1988-10-01	Qtr4	Sussex	Inland Bays	Lewes-Rehoboth Canal	305041	7.66667
1988-10-01	Qtr4	Sussex	Chesapeake Bay	Broad Creek	307031	8.5
1989-01-01	Qtr1	Sussex	Delaware Bay	Cedar Creek	301021	8.5
1989-01-01	Qtr1	Sussex	Delaware Bay	Cedar Creek	301031	6
1989-01-01	Qtr1	Sussex	Inland Bays	Lewes-Rehoboth Canal	305011	5.5
1989-01-01	Qtr1	Sussex	Inland Bays	Lewes-Rehoboth Canal	305041	4.5
1989-01-01	Qtr1	Sussex	Chesapeake Bay	Broad Creek	307031	6.33333
1989-01-01	Qtr1	Sussex	Inland Bays	Rehoboth Bay	308031	6
1989-01-01	Qtr1	Sussex	Inland Bays	Little Assawoman Bay	310011	9
1989-01-01	Qtr1	Sussex	Inland Bays	Buntings Branch	311041	9
1989-04-01	Qtr2	Sussex	Delaware Bay	Cedar Creek	301021	20.3333
1989-04-01	Qtr2	Sussex	Delaware Bay	Cedar Creek	301031	19.6667
1989-04-01	Qtr2	Sussex	Chesapeake Bay	Nanticoke River	304191	15
1989-04-01	Qtr2	Sussex	Chesapeake Bay	Nanticoke River	304311	8.66667
1989-04-01	Qtr2	Sussex	Chesapeake Bay	Nanticoke River	304321	16
1989-04-01	Qtr2	Sussex	Inland Bays	Lewes-Rehoboth Canal	305011	19.6667
1989-04-01	Qtr2	Sussex	Inland Bays	Lewes-Rehoboth Canal	305041	19.6667
1989-04-01	Qtr2	Sussex	Inland Bays	Rehoboth Bay	306091	16.5
1989-04-01	Qtr2	Sussex	Inland Bays	Indian River Bay	306111	21
1989-04-01	Qtr2	Sussex	Inland Bays	Indian River Bay	306121	16
1989-04-01	Qtr2	Sussex	Inland Bays	Indian River	306181	18
1989-04-01	Qtr2	Sussex	Inland Bays	Indian River	306331	23.5
1989-04-01	Qtr2	Sussex	Inland Bays	Little Assawoman Bay	310011	22.5
1989-07-01	Qtr3	Sussex	Delaware Bay	Cedar Creek	301021	25
1989-07-01	Qtr3	Sussex	Delaware Bay	Cedar Creek	301031	25
1989-07-01	Qtr3	Sussex	Chesapeake Bay	Nanticoke River	304191	19
1989-07-01	Qtr3	Sussex	Chesapeake Bay	Nanticoke River	304311	19.5
1989-07-01	Qtr3	Sussex	Chesapeake Bay	Nanticoke River	304321	22.5
1989-07-01	Qtr3	Sussex	Inland Bays	Lewes-Rehoboth Canal	305011	23
1989-07-01	Qtr3	Sussex	Inland Bays	Lewes-Rehoboth Canal	305041	23
1989-07-01	Qtr3	Sussex	Inland Bays	Rehoboth Bay	306091	22.8333
1989-07-01	Qtr3	Sussex	Inland Bays	Indian River Bay	306111	22.8333
1989-07-01	Qtr3	Sussex	Inland Bays	Indian River Bay	306121	23
1989-07-01	Qtr3	Sussex	Inland Bays	Indian River	306181	22.3333
1989-07-01	Qtr3	Sussex	Inland Bays	Indian River	306331	28
1989-07-01	Qtr3	Sussex	Inland Bays	Little Assawoman Bay	310011	23
1989-07-01	Qtr3	Sussex	Inland Bays	Buntings Branch	311041	19
1989-10-01	Qtr4	Sussex	Delaware Bay	Cedar Creek	301021	7
1989-10-01	Qtr4	Sussex	Delaware Bay	Cedar Creek	301031	6
1989-10-01	Qtr4	Sussex	Chesapeake Bay	Nanticoke River	304191	11.6667
1989-10-01	Qtr4	Sussex	Chesapeake Bay	Nanticoke River	304311	11.6667
1989-10-01	Qtr4	Sussex	Chesapeake Bay	Nanticoke River	304321	12.6667
1989-10-01	Qtr4	Sussex	Inland Bays	Lewes-Rehoboth Canal	305011	1
1989-10-01	Qtr4	Sussex	Inland Bays	Lewes-Rehoboth Canal	305041	4
1989-10-01	Qtr4	Sussex	Inland Bays	Little Assawoman Bay	310011	0
1990-01-01	Qtr1	Sussex	Delaware Bay	Cedar Creek	301021	5
1990-01-01	Qtr1	Sussex	Delaware Bay	Cedar Creek	301031	4.5
1990-01-01	Qtr1	Sussex	Chesapeake Bay	Nanticoke River	304191	10.5
1990-01-01	Qtr1	Sussex	Chesapeake Bay	Nanticoke River	304311	10
1990-01-01	Qtr1	Sussex	Chesapeake Bay	Nanticoke River	304321	9.66667
1990-01-01	Qtr1	Sussex	Inland Bays	Lewes-Rehoboth Canal	305011	7.33333
1990-01-01	Qtr1	Sussex	Inland Bays	Lewes-Rehoboth Canal	305041	5.8
1990-01-01	Qtr1	Sussex	Inland Bays	Little Assawoman Bay	310011	8.25
1990-01-01	Qtr1	Sussex	Inland Bays	Buntings Branch	311041	9.66667
1990-04-01	Qtr2	Sussex	Delaware Bay	Cedar Creek	301021	13
1990-04-01	Qtr2	Sussex	Delaware Bay	Cedar Creek	301031	12
1990-04-01	Qtr2	Sussex	Chesapeake Bay	Nanticoke River	304191	16.3333
1990-04-01	Qtr2	Sussex	Chesapeake Bay	Nanticoke River	304311	18
1990-04-01	Qtr2	Sussex	Chesapeake Bay	Nanticoke River	304321	18
1990-04-01	Qtr2	Sussex	Inland Bays	Lewes-Rehoboth Canal	305011	18.6667
1990-04-01	Qtr2	Sussex	Inland Bays	Lewes-Rehoboth Canal	305041	19
1990-04-01	Qtr2	Sussex	Inland Bays	Rehoboth Bay	306091	19
1990-04-01	Qtr2	Sussex	Inland Bays	Indian River Bay	306111	11.1
1990-04-01	Qtr2	Sussex	Inland Bays	Indian River Bay	306121	18
1990-04-01	Qtr2	Sussex	Inland Bays	Indian River	306181	21
1990-04-01	Qtr2	Sussex	Inland Bays	Indian River	306331	23
1990-04-01	Qtr2	Sussex	Chesapeake Bay	Broad Creek	307171	17.5
1990-04-01	Qtr2	Sussex	Inland Bays	Little Assawoman Bay	310011	22.6667
1990-04-01	Qtr2	Sussex	Inland Bays	Buntings Branch	311041	18.5
1990-07-01	Qtr3	Sussex	Delaware Bay	Cedar Creek	301021	25.5
1990-07-01	Qtr3	Sussex	Delaware Bay	Cedar Creek	301031	24.5
1990-07-01	Qtr3	Sussex	Delaware Bay	Broadkill River	303021	19
1990-07-01	Qtr3	Sussex	Delaware Bay	Broadkill River	303061	17
1990-07-01	Qtr3	Sussex	Chesapeake Bay	Nanticoke River	304191	22.5
1990-07-01	Qtr3	Sussex	Chesapeake Bay	Nanticoke River	304311	25.5
1990-07-01	Qtr3	Sussex	Chesapeake Bay	Nanticoke River	304321	27.5
1990-07-01	Qtr3	Sussex	Inland Bays	Lewes-Rehoboth Canal	305011	24.6667
1990-07-01	Qtr3	Sussex	Inland Bays	Lewes-Rehoboth Canal	305041	24
1990-07-01	Qtr3	Sussex	Inland Bays	Rehoboth Bay	306091	24
1990-07-01	Qtr3	Sussex	Inland Bays	Indian River Bay	306111	24
1990-07-01	Qtr3	Sussex	Inland Bays	Indian River Bay	306121	23.6667
1990-07-01	Qtr3	Sussex	Inland Bays	Indian River	306181	25.3333
1990-07-01	Qtr3	Sussex	Inland Bays	Indian River	306331	30.3333
1990-07-01	Qtr3	Sussex	Chesapeake Bay	Broad Creek	307171	26.3333
1990-07-01	Qtr3	Sussex	Inland Bays	Little Assawoman Bay	310011	27
1990-07-01	Qtr3	Sussex	Inland Bays	Buntings Branch	311041	21
1990-10-01	Qtr4	Sussex	Delaware Bay	Cedar Creek	301021	7
1990-10-01	Qtr4	Sussex	Delaware Bay	Cedar Creek	301031	6
1990-10-01	Qtr4	Sussex	Chesapeake Bay	Nanticoke River	304191	13
1990-10-01	Qtr4	Sussex	Chesapeake Bay	Nanticoke River	304311	13.6667
1990-10-01	Qtr4	Sussex	Chesapeake Bay	Nanticoke River	304321	14.3333
1990-10-01	Qtr4	Sussex	Inland Bays	Lewes-Rehoboth Canal	305011	9
1990-10-01	Qtr4	Sussex	Inland Bays	Lewes-Rehoboth Canal	305041	9.33333
1990-10-01	Qtr4	Sussex	Inland Bays	Indian River Bay	306111	9.66667
1990-10-01	Qtr4	Sussex	Chesapeake Bay	Broad Creek	307171	19
1990-10-01	Qtr4	Sussex	Inland Bays	Little Assawoman Bay	310011	14.5
1991-01-01	Qtr1	Sussex	Delaware Bay	Cedar Creek	301021	6.5
1991-01-01	Qtr1	Sussex	Delaware Bay	Cedar Creek	301031	7
1991-01-01	Qtr1	Sussex	Chesapeake Bay	Nanticoke River	304191	9.66667
1991-01-01	Qtr1	Sussex	Chesapeake Bay	Nanticoke River	304311	10.3333
1991-01-01	Qtr1	Sussex	Chesapeake Bay	Nanticoke River	304321	10
1991-01-01	Qtr1	Sussex	Inland Bays	Lewes-Rehoboth Canal	305011	5
1991-01-01	Qtr1	Sussex	Inland Bays	Lewes-Rehoboth Canal	305041	5
1991-01-01	Qtr1	Sussex	Inland Bays	Indian River Bay	306111	5
1991-01-01	Qtr1	Sussex	Chesapeake Bay	Broad Creek	307171	7
1991-01-01	Qtr1	Sussex	Chesapeake Bay	Gravelly Branch	316011	12
1991-04-01	Qtr2	Sussex	Delaware Bay	Cedar Creek	301021	16.5
1991-04-01	Qtr2	Sussex	Delaware Bay	Cedar Creek	301031	16.5
1991-04-01	Qtr2	Sussex	Chesapeake Bay	Nanticoke River	304191	20.5
1991-04-01	Qtr2	Sussex	Chesapeake Bay	Nanticoke River	304311	22.6667
1991-04-01	Qtr2	Sussex	Chesapeake Bay	Nanticoke River	304321	23.6667
1991-04-01	Qtr2	Sussex	Chesapeake Bay	Nanticoke River	304471	15
1991-04-01	Qtr2	Sussex	Inland Bays	Lewes-Rehoboth Canal	305011	22.5
1991-04-01	Qtr2	Sussex	Inland Bays	Lewes-Rehoboth Canal	305041	22.5
1991-04-01	Qtr2	Sussex	Inland Bays	Rehoboth Bay	306091	26
1991-04-01	Qtr2	Sussex	Inland Bays	Indian River Bay	306111	22
1991-04-01	Qtr2	Sussex	Inland Bays	Indian River Bay	306121	25
1991-04-01	Qtr2	Sussex	Inland Bays	Indian River	306181	27
1991-04-01	Qtr2	Sussex	Inland Bays	Indian River	306331	32
1991-04-01	Qtr2	Sussex	Inland Bays	Little Assawoman Bay	310011	21
1991-04-01	Qtr2	Sussex	Chesapeake Bay	Gravelly Branch	316011	20.5714
1991-07-01	Qtr3	Sussex	Delaware Bay	Cedar Creek	301021	25.5
1991-07-01	Qtr3	Sussex	Delaware Bay	Cedar Creek	301031	24.5
1991-07-01	Qtr3	Sussex	Chesapeake Bay	Nanticoke River	304191	22.1667
1991-07-01	Qtr3	Sussex	Chesapeake Bay	Nanticoke River	304311	27.3333
1991-07-01	Qtr3	Sussex	Chesapeake Bay	Nanticoke River	304321	28
1991-07-01	Qtr3	Sussex	Chesapeake Bay	Nanticoke River	304471	24
1991-07-01	Qtr3	Sussex	Inland Bays	Lewes-Rehoboth Canal	305011	27
1991-07-01	Qtr3	Sussex	Inland Bays	Lewes-Rehoboth Canal	305041	27
1991-07-01	Qtr3	Sussex	Inland Bays	Rehoboth Bay	306091	26
1991-07-01	Qtr3	Sussex	Inland Bays	Indian River Bay	306111	26
1991-07-01	Qtr3	Sussex	Inland Bays	Indian River Bay	306121	26
1991-07-01	Qtr3	Sussex	Inland Bays	Indian River	306181	28
1991-07-01	Qtr3	Sussex	Inland Bays	Indian River	306331	28
1991-07-01	Qtr3	Sussex	Inland Bays	Little Assawoman Bay	310011	28
1991-07-01	Qtr3	Sussex	Chesapeake Bay	Gravelly Branch	316011	22.4
1991-10-01	Qtr4	Sussex	Delaware Bay	Cedar Creek	301021	11
1991-10-01	Qtr4	Sussex	Delaware Bay	Cedar Creek	301031	15
1991-10-01	Qtr4	Sussex	Delaware Bay	Cedar Creek	301091	9
1991-10-01	Qtr4	Sussex	Chesapeake Bay	Nanticoke River	304191	9.33333
1991-10-01	Qtr4	Sussex	Chesapeake Bay	Nanticoke River	304311	10
1991-10-01	Qtr4	Sussex	Chesapeake Bay	Nanticoke River	304321	10.6667
1991-10-01	Qtr4	Sussex	Chesapeake Bay	Nanticoke River	304471	12.3333
1991-10-01	Qtr4	Sussex	Inland Bays	Lewes-Rehoboth Canal	305011	12.5
1991-10-01	Qtr4	Sussex	Inland Bays	Rehoboth Bay	306091	12
1991-10-01	Qtr4	Sussex	Inland Bays	Indian River Bay	306111	12
1991-10-01	Qtr4	Sussex	Inland Bays	Indian River Bay	306121	12
1991-10-01	Qtr4	Sussex	Inland Bays	Indian River	306181	11
1991-10-01	Qtr4	Sussex	Inland Bays	Indian River	306331	15.5
1991-10-01	Qtr4	Sussex	Inland Bays	Rehoboth Bay	308031	12.5
1991-10-01	Qtr4	Sussex	Inland Bays	Iron Branch	309041	6
1991-10-01	Qtr4	Sussex	Inland Bays	Little Assawoman Bay	310011	10
1991-10-01	Qtr4	Sussex	Inland Bays	Buntings Branch	311041	9
1991-10-01	Qtr4	Sussex	Chesapeake Bay	Gravelly Branch	316011	9
1992-01-01	Qtr1	Sussex	Delaware Bay	Cedar Creek	301021	9.5
1992-01-01	Qtr1	Sussex	Delaware Bay	Cedar Creek	301031	11
1992-01-01	Qtr1	Sussex	Delaware Bay	Cedar Creek	301091	8
1992-01-01	Qtr1	Sussex	Delaware Bay	Broadkill River	303331	3
1992-01-01	Qtr1	Sussex	Chesapeake Bay	Nanticoke River	304191	4.33333
1992-01-01	Qtr1	Sussex	Chesapeake Bay	Nanticoke River	304311	5.33333
1992-01-01	Qtr1	Sussex	Chesapeake Bay	Nanticoke River	304321	5.33333
1992-01-01	Qtr1	Sussex	Chesapeake Bay	Nanticoke River	304471	5.5
1992-01-01	Qtr1	Sussex	Inland Bays	Lewes-Rehoboth Canal	305011	6.33333
1992-01-01	Qtr1	Sussex	Inland Bays	Rehoboth Bay	306091	7
1992-01-01	Qtr1	Sussex	Inland Bays	Indian River Bay	306111	8
1992-01-01	Qtr1	Sussex	Inland Bays	Indian River Bay	306121	9
1992-01-01	Qtr1	Sussex	Inland Bays	Indian River	306181	10
1992-01-01	Qtr1	Sussex	Inland Bays	Indian River	306331	13
1992-01-01	Qtr1	Sussex	Chesapeake Bay	Broad Creek	307031	11
1992-01-01	Qtr1	Sussex	Chesapeake Bay	Broad Creek	307171	7
1992-01-01	Qtr1	Sussex	Inland Bays	Rehoboth Bay	308031	5.66667
1992-01-01	Qtr1	Sussex	Inland Bays	Iron Branch	309041	1
1992-01-01	Qtr1	Sussex	Inland Bays	Little Assawoman Bay	310011	4
1992-01-01	Qtr1	Sussex	Inland Bays	Buntings Branch	311041	5.5
1992-01-01	Qtr1	Sussex	Chesapeake Bay	Gravelly Branch	316011	4.66667
1992-04-01	Qtr2	Sussex	Delaware Bay	Cedar Creek	301021	19
1992-04-01	Qtr2	Sussex	Delaware Bay	Cedar Creek	301091	16
1992-04-01	Qtr2	Sussex	Chesapeake Bay	Nanticoke River	304191	17
1992-04-01	Qtr2	Sussex	Chesapeake Bay	Nanticoke River	304311	17.125
1992-04-01	Qtr2	Sussex	Chesapeake Bay	Nanticoke River	304321	20.3333
1992-04-01	Qtr2	Sussex	Chesapeake Bay	Nanticoke River	304471	19.6667
1992-04-01	Qtr2	Sussex	Inland Bays	Lewes-Rehoboth Canal	305011	19.3333
1992-04-01	Qtr2	Sussex	Inland Bays	Rehoboth Bay	306091	16.6667
1992-04-01	Qtr2	Sussex	Inland Bays	Indian River Bay	306111	16.6667
1992-04-01	Qtr2	Sussex	Inland Bays	Indian River Bay	306121	16.3333
1992-04-01	Qtr2	Sussex	Inland Bays	Indian River	306181	19.3333
1992-04-01	Qtr2	Sussex	Inland Bays	Indian River	306331	22
1992-04-01	Qtr2	Sussex	Chesapeake Bay	Broad Creek	307031	18
1992-04-01	Qtr2	Sussex	Inland Bays	Rehoboth Bay	308031	20
1992-04-01	Qtr2	Sussex	Inland Bays	Little Assawoman Bay	310011	20.5
1992-04-01	Qtr2	Sussex	Inland Bays	Buntings Branch	311041	11
1992-04-01	Qtr2	Sussex	Chesapeake Bay	Gravelly Branch	316011	17.6667
1992-07-01	Qtr3	Sussex	Delaware Bay	Cedar Creek	301021	28
1992-07-01	Qtr3	Sussex	Delaware Bay	Cedar Creek	301091	27
1992-07-01	Qtr3	Sussex	Chesapeake Bay	Nanticoke River	304191	21.6667
1992-07-01	Qtr3	Sussex	Chesapeake Bay	Nanticoke River	304311	25
1992-07-01	Qtr3	Sussex	Chesapeake Bay	Nanticoke River	304321	26.6667
1992-07-01	Qtr3	Sussex	Chesapeake Bay	Nanticoke River	304471	27.5
1992-07-01	Qtr3	Sussex	Inland Bays	Lewes-Rehoboth Canal	305011	26.3333
1992-07-01	Qtr3	Sussex	Inland Bays	Rehoboth Bay	306091	26
1992-07-01	Qtr3	Sussex	Inland Bays	Indian River Bay	306111	23.6667
1992-07-01	Qtr3	Sussex	Inland Bays	Indian River Bay	306121	23.6667
1992-07-01	Qtr3	Sussex	Inland Bays	Indian River	306181	26
1992-07-01	Qtr3	Sussex	Inland Bays	Indian River	306331	28.3333
1992-07-01	Qtr3	Sussex	Chesapeake Bay	Broad Creek	307031	24
1992-07-01	Qtr3	Sussex	Chesapeake Bay	Broad Creek	307171	27
1992-07-01	Qtr3	Sussex	Inland Bays	Rehoboth Bay	308031	27
1992-07-01	Qtr3	Sussex	Inland Bays	Indian River	308281	24.8
1992-07-01	Qtr3	Sussex	Inland Bays	Iron Branch	309041	23
1992-07-01	Qtr3	Sussex	Inland Bays	Little Assawoman Bay	310011	25
1992-07-01	Qtr3	Sussex	Inland Bays	Buntings Branch	311041	22
1992-07-01	Qtr3	Sussex	Chesapeake Bay	Gravelly Branch	316011	23
1992-10-01	Qtr4	Sussex	Chesapeake Bay	Nanticoke River	304191	12
1992-10-01	Qtr4	Sussex	Chesapeake Bay	Nanticoke River	304311	12
1992-10-01	Qtr4	Sussex	Chesapeake Bay	Nanticoke River	304321	11.6667
1992-10-01	Qtr4	Sussex	Chesapeake Bay	Nanticoke River	304471	15
1992-10-01	Qtr4	Sussex	Inland Bays	Lewes-Rehoboth Canal	305011	9.33333
1992-10-01	Qtr4	Sussex	Inland Bays	Rehoboth Bay	306091	15
1992-10-01	Qtr4	Sussex	Inland Bays	Indian River Bay	306111	15
1992-10-01	Qtr4	Sussex	Inland Bays	Indian River Bay	306121	16
1992-10-01	Qtr4	Sussex	Inland Bays	Indian River	306181	16
1992-10-01	Qtr4	Sussex	Inland Bays	Indian River	306331	19
1992-10-01	Qtr4	Sussex	Inland Bays	Rehoboth Bay	308031	8.33333
1992-10-01	Qtr4	Sussex	Chesapeake Bay	Gravelly Branch	316011	11
1993-01-01	Qtr1	Sussex	Chesapeake Bay	Nanticoke River	304191	6.66667
1993-01-01	Qtr1	Sussex	Chesapeake Bay	Nanticoke River	304311	6
1993-01-01	Qtr1	Sussex	Chesapeake Bay	Nanticoke River	304321	6.66667
1993-01-01	Qtr1	Sussex	Inland Bays	Lewes-Rehoboth Canal	305011	3.66667
1993-01-01	Qtr1	Sussex	Inland Bays	Rehoboth Bay	308031	4
1993-01-01	Qtr1	Sussex	Chesapeake Bay	Gravelly Branch	316011	7
1993-04-01	Qtr2	Sussex	Chesapeake Bay	Nanticoke River	304191	16.6667
1993-04-01	Qtr2	Sussex	Chesapeake Bay	Nanticoke River	304311	19
1993-04-01	Qtr2	Sussex	Chesapeake Bay	Nanticoke River	304321	19
1993-04-01	Qtr2	Sussex	Chesapeake Bay	Nanticoke River	304471	19
1993-04-01	Qtr2	Sussex	Inland Bays	Lewes-Rehoboth Canal	305011	19.3333
1993-04-01	Qtr2	Sussex	Inland Bays	Rehoboth Bay	306091	17.6667
1993-04-01	Qtr2	Sussex	Inland Bays	Indian River Bay	306111	17
1993-04-01	Qtr2	Sussex	Inland Bays	Indian River Bay	306121	18.3333
1993-04-01	Qtr2	Sussex	Inland Bays	Indian River	306181	20
1993-04-01	Qtr2	Sussex	Inland Bays	Indian River	306331	23.6667
1993-04-01	Qtr2	Sussex	Inland Bays	Rehoboth Bay	308031	19.3333
1993-04-01	Qtr2	Sussex	Chesapeake Bay	Gravelly Branch	316011	17
1993-07-01	Qtr3	Sussex	Chesapeake Bay	Nanticoke River	304311	24
1993-07-01	Qtr3	Sussex	Chesapeake Bay	Nanticoke River	304321	24
1993-07-01	Qtr3	Sussex	Chesapeake Bay	Nanticoke River	304471	27
1993-07-01	Qtr3	Sussex	Inland Bays	Lewes-Rehoboth Canal	305011	29
1993-07-01	Qtr3	Sussex	Inland Bays	Rehoboth Bay	306091	27
1993-07-01	Qtr3	Sussex	Inland Bays	Indian River Bay	306111	22
1993-07-01	Qtr3	Sussex	Inland Bays	Indian River Bay	306121	25
1993-07-01	Qtr3	Sussex	Inland Bays	Indian River	306181	30
1993-07-01	Qtr3	Sussex	Inland Bays	Indian River	306331	33
1993-07-01	Qtr3	Sussex	Inland Bays	Rehoboth Bay	308031	30
1993-07-01	Qtr3	Sussex	Chesapeake Bay	Gravelly Branch	316011	20
1993-10-01	Qtr4	Sussex	Chesapeake Bay	Nanticoke River	304191	9
1993-10-01	Qtr4	Sussex	Chesapeake Bay	Nanticoke River	304311	8
1993-10-01	Qtr4	Sussex	Chesapeake Bay	Nanticoke River	304321	9
1993-10-01	Qtr4	Sussex	Inland Bays	Lewes-Rehoboth Canal	305011	18
1993-10-01	Qtr4	Sussex	Inland Bays	Rehoboth Bay	306091	10
1993-10-01	Qtr4	Sussex	Inland Bays	Indian River Bay	306111	12
1993-10-01	Qtr4	Sussex	Inland Bays	Indian River Bay	306121	7
1993-10-01	Qtr4	Sussex	Inland Bays	Indian River	306181	7
1993-10-01	Qtr4	Sussex	Inland Bays	Indian River	306331	15
1993-10-01	Qtr4	Sussex	Inland Bays	Rehoboth Bay	308031	18
1993-10-01	Qtr4	Sussex	Inland Bays	Buntings Branch	311041	15
1993-10-01	Qtr4	Sussex	Chesapeake Bay	Gravelly Branch	316011	8
1994-01-01	Qtr1	Sussex	Delaware Bay	Cedar Creek	301021	2
1994-01-01	Qtr1	Sussex	Delaware Bay	Cedar Creek	301091	0
1994-01-01	Qtr1	Sussex	Chesapeake Bay	Nanticoke River	304191	6
1994-01-01	Qtr1	Sussex	Chesapeake Bay	Nanticoke River	304311	5
1994-01-01	Qtr1	Sussex	Chesapeake Bay	Nanticoke River	304321	6
1994-01-01	Qtr1	Sussex	Inland Bays	Lewes-Rehoboth Canal	305011	3
1994-01-01	Qtr1	Sussex	Inland Bays	Rehoboth Bay	308031	5
1994-01-01	Qtr1	Sussex	Inland Bays	Iron Branch	309041	0
1994-01-01	Qtr1	Sussex	Inland Bays	Little Assawoman Bay	310011	10
1994-01-01	Qtr1	Sussex	Inland Bays	Buntings Branch	311041	0
1994-01-01	Qtr1	Sussex	Chesapeake Bay	Gravelly Branch	316011	5
1994-04-01	Qtr2	Sussex	Delaware Bay	Cedar Creek	301021	24
1994-04-01	Qtr2	Sussex	Delaware Bay	Cedar Creek	301091	23
1994-04-01	Qtr2	Sussex	Chesapeake Bay	Nanticoke River	304471	26
1994-04-01	Qtr2	Sussex	Inland Bays	Lewes-Rehoboth Canal	305011	17
1994-04-01	Qtr2	Sussex	Chesapeake Bay	Broad Creek	307171	16
1994-04-01	Qtr2	Sussex	Inland Bays	Rehoboth Bay	308031	19
1994-04-01	Qtr2	Sussex	Inland Bays	Iron Branch	309041	15
1994-04-01	Qtr2	Sussex	Inland Bays	Little Assawoman Bay	310011	25
1994-04-01	Qtr2	Sussex	Inland Bays	Buntings Branch	311041	14
1994-07-01	Qtr3	Sussex	Chesapeake Bay	Nanticoke River	304191	21.5
1994-07-01	Qtr3	Sussex	Chesapeake Bay	Nanticoke River	304311	24
1994-07-01	Qtr3	Sussex	Chesapeake Bay	Nanticoke River	304321	25.5
1994-07-01	Qtr3	Sussex	Chesapeake Bay	Nanticoke River	304471	24
1994-07-01	Qtr3	Sussex	Inland Bays	Lewes-Rehoboth Canal	305011	26
1994-07-01	Qtr3	Sussex	Inland Bays	Rehoboth Bay	306091	26
1994-07-01	Qtr3	Sussex	Inland Bays	Indian River Bay	306111	24.5
1994-07-01	Qtr3	Sussex	Inland Bays	Indian River Bay	306121	23
1994-07-01	Qtr3	Sussex	Inland Bays	Indian River	306181	27
1994-07-01	Qtr3	Sussex	Inland Bays	Indian River	306331	33
1994-07-01	Qtr3	Sussex	Chesapeake Bay	Broad Creek	307031	22
1994-07-01	Qtr3	Sussex	Chesapeake Bay	Broad Creek	307171	26.1667
1994-07-01	Qtr3	Sussex	Inland Bays	Rehoboth Bay	308031	26
1994-07-01	Qtr3	Sussex	Inland Bays	Iron Branch	309041	20
1994-07-01	Qtr3	Sussex	Inland Bays	Little Assawoman Bay	310011	22
1994-07-01	Qtr3	Sussex	Inland Bays	Buntings Branch	311041	19
1994-07-01	Qtr3	Sussex	Chesapeake Bay	Gravelly Branch	316011	22.5
1994-10-01	Qtr4	Sussex	Chesapeake Bay	Nanticoke River	304191	10
1994-10-01	Qtr4	Sussex	Chesapeake Bay	Nanticoke River	304311	10
1994-10-01	Qtr4	Sussex	Chesapeake Bay	Nanticoke River	304321	11
1994-10-01	Qtr4	Sussex	Chesapeake Bay	Nanticoke River	304471	17
1994-10-01	Qtr4	Sussex	Inland Bays	Lewes-Rehoboth Canal	305011	14
1994-10-01	Qtr4	Sussex	Inland Bays	Rehoboth Bay	306091	15
1994-10-01	Qtr4	Sussex	Inland Bays	Indian River Bay	306111	15
1994-10-01	Qtr4	Sussex	Inland Bays	Indian River Bay	306121	15
1994-10-01	Qtr4	Sussex	Inland Bays	Indian River	306181	13
1994-10-01	Qtr4	Sussex	Inland Bays	Indian River	306331	17
1994-10-01	Qtr4	Sussex	Chesapeake Bay	Broad Creek	307171	7
1994-10-01	Qtr4	Sussex	Inland Bays	Rehoboth Bay	308031	14
1994-10-01	Qtr4	Sussex	Inland Bays	Iron Branch	309041	14
1994-10-01	Qtr4	Sussex	Inland Bays	Buntings Branch	311041	14
1994-10-01	Qtr4	Sussex	Chesapeake Bay	Gravelly Branch	316011	8.33333
1995-01-01	Qtr1	Sussex	Delaware Bay	Cedar Creek	301021	5
1995-01-01	Qtr1	Sussex	Delaware Bay	Cedar Creek	301091	5
1995-01-01	Qtr1	Sussex	Chesapeake Bay	Nanticoke River	304191	5
1995-01-01	Qtr1	Sussex	Chesapeake Bay	Nanticoke River	304311	4
1995-01-01	Qtr1	Sussex	Chesapeake Bay	Nanticoke River	304321	4
1995-01-01	Qtr1	Sussex	Inland Bays	Lewes-Rehoboth Canal	305011	4
1995-01-01	Qtr1	Sussex	Inland Bays	Lewes-Rehoboth Canal	305041	4
1995-01-01	Qtr1	Sussex	Chesapeake Bay	Broad Creek	307031	4
1995-01-01	Qtr1	Sussex	Chesapeake Bay	Broad Creek	307171	4
1995-01-01	Qtr1	Sussex	Inland Bays	Rehoboth Bay	308031	3
1995-01-01	Qtr1	Sussex	Inland Bays	Iron Branch	309041	1
1995-01-01	Qtr1	Sussex	Inland Bays	Little Assawoman Bay	310011	4
1995-01-01	Qtr1	Sussex	Inland Bays	Buntings Branch	311041	0
1995-01-01	Qtr1	Sussex	Chesapeake Bay	Gravelly Branch	316011	3
1995-04-01	Qtr2	Sussex	Delaware Bay	Cedar Creek	301021	10
1995-04-01	Qtr2	Sussex	Delaware Bay	Cedar Creek	301031	9
1995-04-01	Qtr2	Sussex	Delaware Bay	Broadkill River	303331	24
1995-04-01	Qtr2	Sussex	Chesapeake Bay	Nanticoke River	304191	14
1995-04-01	Qtr2	Sussex	Chesapeake Bay	Nanticoke River	304311	16
1995-04-01	Qtr2	Sussex	Chesapeake Bay	Nanticoke River	304321	14
1995-04-01	Qtr2	Sussex	Chesapeake Bay	Nanticoke River	304471	14
1995-04-01	Qtr2	Sussex	Inland Bays	Lewes-Rehoboth Canal	305011	21
1995-04-01	Qtr2	Sussex	Inland Bays	Rehoboth Bay	306091	21
1995-04-01	Qtr2	Sussex	Inland Bays	Indian River Bay	306111	19
1995-04-01	Qtr2	Sussex	Inland Bays	Indian River Bay	306121	19
1995-04-01	Qtr2	Sussex	Inland Bays	Indian River	306181	21
1995-04-01	Qtr2	Sussex	Inland Bays	Indian River	306331	25
1995-04-01	Qtr2	Sussex	Chesapeake Bay	Broad Creek	307171	27
1995-04-01	Qtr2	Sussex	Inland Bays	Rehoboth Bay	308031	26
1995-04-01	Qtr2	Sussex	Inland Bays	Little Assawoman Bay	310011	8
1995-04-01	Qtr2	Sussex	Inland Bays	Buntings Branch	311041	18
1995-04-01	Qtr2	Sussex	Chesapeake Bay	Gravelly Branch	316011	14.5
1995-07-01	Qtr3	Sussex	Delaware Bay	Cedar Creek	301031	23
1995-07-01	Qtr3	Sussex	Delaware Bay	Broadkill River	303331	26
1995-07-01	Qtr3	Sussex	Chesapeake Bay	Nanticoke River	304191	24
1995-07-01	Qtr3	Sussex	Chesapeake Bay	Nanticoke River	304311	25
1995-07-01	Qtr3	Sussex	Chesapeake Bay	Nanticoke River	304321	25
1995-07-01	Qtr3	Sussex	Chesapeake Bay	Nanticoke River	304471	25
1995-07-01	Qtr3	Sussex	Inland Bays	Lewes-Rehoboth Canal	305011	34
1995-07-01	Qtr3	Sussex	Inland Bays	Lewes-Rehoboth Canal	305041	30
1995-07-01	Qtr3	Sussex	Inland Bays	Rehoboth Bay	306091	34
1995-07-01	Qtr3	Sussex	Inland Bays	Indian River Bay	306111	29
1995-07-01	Qtr3	Sussex	Inland Bays	Indian River Bay	306121	32
1995-07-01	Qtr3	Sussex	Inland Bays	Indian River	306181	31
1995-07-01	Qtr3	Sussex	Inland Bays	Indian River	306331	29
1995-07-01	Qtr3	Sussex	Chesapeake Bay	Broad Creek	307171	27.1
1995-07-01	Qtr3	Sussex	Inland Bays	Rehoboth Bay	308031	29
1995-07-01	Qtr3	Sussex	Inland Bays	Indian River	308281	27
1995-07-01	Qtr3	Sussex	Inland Bays	Little Assawoman Bay	310011	24
1995-07-01	Qtr3	Sussex	Inland Bays	Buntings Branch	311041	22
1995-07-01	Qtr3	Sussex	Chesapeake Bay	Gravelly Branch	316011	20
1995-10-01	Qtr4	Sussex	Chesapeake Bay	Nanticoke River	304191	14
1995-10-01	Qtr4	Sussex	Chesapeake Bay	Nanticoke River	304311	15
1995-10-01	Qtr4	Sussex	Chesapeake Bay	Nanticoke River	304321	16
1995-10-01	Qtr4	Sussex	Chesapeake Bay	Nanticoke River	304471	15
1995-10-01	Qtr4	Sussex	Inland Bays	Lewes-Rehoboth Canal	305011	21
1995-10-01	Qtr4	Sussex	Inland Bays	Lewes-Rehoboth Canal	305041	21
1995-10-01	Qtr4	Sussex	Inland Bays	Indian River Bay	306121	20
1995-10-01	Qtr4	Sussex	Inland Bays	Indian River	306331	25
1995-10-01	Qtr4	Sussex	Inland Bays	Rehoboth Bay	308031	23
1995-10-01	Qtr4	Sussex	Inland Bays	Little Assawoman Bay	310011	26
1995-10-01	Qtr4	Sussex	Chesapeake Bay	Gravelly Branch	316011	13
1996-01-01	Qtr1	Sussex	Delaware Bay	Cedar Creek	301031	10
1996-01-01	Qtr1	Sussex	Chesapeake Bay	Nanticoke River	304191	10.5
1996-01-01	Qtr1	Sussex	Chesapeake Bay	Nanticoke River	304311	11
1996-01-01	Qtr1	Sussex	Chesapeake Bay	Nanticoke River	304321	11
1996-01-01	Qtr1	Sussex	Chesapeake Bay	Nanticoke River	304471	10
1996-01-01	Qtr1	Sussex	Inland Bays	Lewes-Rehoboth Canal	305011	5.6
1996-01-01	Qtr1	Sussex	Inland Bays	Lewes-Rehoboth Canal	305041	3.9
1996-01-01	Qtr1	Sussex	Inland Bays	Rehoboth Bay	306091	4.5
1996-01-01	Qtr1	Sussex	Inland Bays	Indian River Bay	306111	4
1996-01-01	Qtr1	Sussex	Inland Bays	Indian River Bay	306121	3.5
1996-01-01	Qtr1	Sussex	Inland Bays	Indian River	306181	6.5
1996-01-01	Qtr1	Sussex	Inland Bays	Indian River	306331	7.6
1996-01-01	Qtr1	Sussex	Inland Bays	Rehoboth Bay	308031	4.4
1996-01-01	Qtr1	Sussex	Inland Bays	Indian River	308281	3.9
1996-01-01	Qtr1	Sussex	Inland Bays	Little Assawoman Bay	310011	5.6
1996-01-01	Qtr1	Sussex	Inland Bays	Buntings Branch	311041	6.7
1996-01-01	Qtr1	Sussex	Chesapeake Bay	Gravelly Branch	316011	10.5
1996-04-01	Qtr2	Sussex	Delaware Bay	Cedar Creek	301031	24
1996-04-01	Qtr2	Sussex	Delaware Bay	Broadkill River	303331	18
1996-04-01	Qtr2	Sussex	Chesapeake Bay	Nanticoke River	304191	21
1996-04-01	Qtr2	Sussex	Chesapeake Bay	Nanticoke River	304311	23
1996-04-01	Qtr2	Sussex	Chesapeake Bay	Nanticoke River	304321	28
1996-04-01	Qtr2	Sussex	Chesapeake Bay	Nanticoke River	304471	26
1996-04-01	Qtr2	Sussex	Inland Bays	Lewes-Rehoboth Canal	305011	24.6
1996-04-01	Qtr2	Sussex	Inland Bays	Lewes-Rehoboth Canal	305041	20
1996-04-01	Qtr2	Sussex	Inland Bays	Rehoboth Bay	306091	24.6
1996-04-01	Qtr2	Sussex	Inland Bays	Indian River Bay	306111	18.3
1996-04-01	Qtr2	Sussex	Inland Bays	Indian River Bay	306121	21.5
1996-04-01	Qtr2	Sussex	Inland Bays	Indian River	306181	26.7
1996-04-01	Qtr2	Sussex	Inland Bays	Indian River	306331	26.4
1996-04-01	Qtr2	Sussex	Inland Bays	Rehoboth Bay	308031	26
1996-04-01	Qtr2	Sussex	Inland Bays	Indian River	308281	24
1996-04-01	Qtr2	Sussex	Inland Bays	Buntings Branch	311041	16
1996-04-01	Qtr2	Sussex	Chesapeake Bay	Gravelly Branch	316011	23
1996-07-01	Qtr3	Sussex	Delaware Bay	Cedar Creek	301021	25
1996-07-01	Qtr3	Sussex	Delaware Bay	Cedar Creek	301031	24.5
1996-07-01	Qtr3	Sussex	Delaware Bay	Cedar Creek	301091	24.5
1996-07-01	Qtr3	Sussex	Delaware Bay	Broadkill River	303021	20.5
1996-07-01	Qtr3	Sussex	Delaware Bay	Broadkill River	303331	27.4
1996-07-01	Qtr3	Sussex	Chesapeake Bay	Nanticoke River	304191	19
1996-07-01	Qtr3	Sussex	Chesapeake Bay	Nanticoke River	304311	23
1996-07-01	Qtr3	Sussex	Chesapeake Bay	Nanticoke River	304321	25
1996-07-01	Qtr3	Sussex	Chesapeake Bay	Nanticoke River	304471	25
1996-07-01	Qtr3	Sussex	Inland Bays	Lewes-Rehoboth Canal	305011	24
1996-07-01	Qtr3	Sussex	Inland Bays	Lewes-Rehoboth Canal	305041	24
1996-07-01	Qtr3	Sussex	Inland Bays	Rehoboth Bay	306091	25
1996-07-01	Qtr3	Sussex	Inland Bays	Indian River Bay	306111	24
1996-07-01	Qtr3	Sussex	Inland Bays	Indian River Bay	306121	25
1996-07-01	Qtr3	Sussex	Inland Bays	Indian River	306181	26
1996-07-01	Qtr3	Sussex	Inland Bays	Indian River	306331	31
1996-07-01	Qtr3	Sussex	Inland Bays	Rehoboth Bay	308031	23
1996-07-01	Qtr3	Sussex	Inland Bays	Indian River	308281	27
1996-07-01	Qtr3	Sussex	Inland Bays	Iron Branch	309041	22
1996-07-01	Qtr3	Sussex	Inland Bays	Little Assawoman Bay	310011	27
1996-07-01	Qtr3	Sussex	Inland Bays	Buntings Branch	311041	20.95
1996-07-01	Qtr3	Sussex	Chesapeake Bay	Gravelly Branch	316011	23
1996-10-01	Qtr4	Sussex	Delaware Bay	Cedar Creek	301021	7
1996-10-01	Qtr4	Sussex	Delaware Bay	Cedar Creek	301031	7
1996-10-01	Qtr4	Sussex	Delaware Bay	Cedar Creek	301091	7
1996-10-01	Qtr4	Sussex	Delaware Bay	Broadkill River	303021	10
1996-10-01	Qtr4	Sussex	Delaware Bay	Broadkill River	303331	10
1996-10-01	Qtr4	Sussex	Chesapeake Bay	Nanticoke River	304191	15.5
1996-10-01	Qtr4	Sussex	Chesapeake Bay	Nanticoke River	304311	16
1996-10-01	Qtr4	Sussex	Chesapeake Bay	Nanticoke River	304321	16.5
1996-10-01	Qtr4	Sussex	Chesapeake Bay	Nanticoke River	304471	16
1996-10-01	Qtr4	Sussex	Inland Bays	Lewes-Rehoboth Canal	305011	17
1996-10-01	Qtr4	Sussex	Inland Bays	Lewes-Rehoboth Canal	305041	17
1996-10-01	Qtr4	Sussex	Inland Bays	Rehoboth Bay	306091	16
1996-10-01	Qtr4	Sussex	Inland Bays	Indian River Bay	306111	17
1996-10-01	Qtr4	Sussex	Inland Bays	Indian River Bay	306121	16
1996-10-01	Qtr4	Sussex	Inland Bays	Indian River	306181	16
1996-10-01	Qtr4	Sussex	Inland Bays	Indian River	306331	19
1996-10-01	Qtr4	Sussex	Inland Bays	Rehoboth Bay	308031	16
1996-10-01	Qtr4	Sussex	Inland Bays	Indian River	308281	14.8
1996-10-01	Qtr4	Sussex	Inland Bays	Iron Branch	309041	15
1996-10-01	Qtr4	Sussex	Inland Bays	Little Assawoman Bay	310011	17
1996-10-01	Qtr4	Sussex	Inland Bays	Buntings Branch	311041	14
1996-10-01	Qtr4	Sussex	Chesapeake Bay	Gravelly Branch	316011	15.8
1997-04-01	Qtr2	Sussex	Delaware Bay	Cedar Creek	301021	17
1997-04-01	Qtr2	Sussex	Delaware Bay	Cedar Creek	301031	15.2
1997-04-01	Qtr2	Sussex	Delaware Bay	Cedar Creek	301091	15
1997-04-01	Qtr2	Sussex	Delaware Bay	Broadkill River	303021	20
1997-04-01	Qtr2	Sussex	Delaware Bay	Broadkill River	303331	27
1997-04-01	Qtr2	Sussex	Chesapeake Bay	Nanticoke River	304191	14.7
1997-04-01	Qtr2	Sussex	Chesapeake Bay	Nanticoke River	304311	16
1997-04-01	Qtr2	Sussex	Chesapeake Bay	Nanticoke River	304321	16
1997-04-01	Qtr2	Sussex	Chesapeake Bay	Nanticoke River	304471	17
1997-04-01	Qtr2	Sussex	Chesapeake Bay	Broad Creek	307171	17
1997-04-01	Qtr2	Sussex	Inland Bays	Little Assawoman Bay	310011	15
1997-04-01	Qtr2	Sussex	Inland Bays	Buntings Branch	311041	14.7
1997-07-01	Qtr3	Sussex	Delaware Bay	Cedar Creek	301021	20
1997-07-01	Qtr3	Sussex	Delaware Bay	Cedar Creek	301031	19
1997-07-01	Qtr3	Sussex	Delaware Bay	Cedar Creek	301091	19
1997-07-01	Qtr3	Sussex	Chesapeake Bay	Marshyhope Creek	302031	17
1997-07-01	Qtr3	Sussex	Delaware Bay	Broadkill River	303021	20
1997-07-01	Qtr3	Sussex	Delaware Bay	Broadkill River	303331	27
1997-07-01	Qtr3	Sussex	Chesapeake Bay	Nanticoke River	304191	22
1997-07-01	Qtr3	Sussex	Chesapeake Bay	Nanticoke River	304311	28
1997-07-01	Qtr3	Sussex	Chesapeake Bay	Nanticoke River	304321	28
1997-07-01	Qtr3	Sussex	Chesapeake Bay	Nanticoke River	304471	29
1997-07-01	Qtr3	Sussex	Inland Bays	Lewes-Rehoboth Canal	305011	26
1997-07-01	Qtr3	Sussex	Inland Bays	Lewes-Rehoboth Canal	305041	25
1997-07-01	Qtr3	Sussex	Inland Bays	Rehoboth Bay	306091	25
1997-07-01	Qtr3	Sussex	Inland Bays	Indian River Bay	306111	24
1997-07-01	Qtr3	Sussex	Inland Bays	Indian River Bay	306121	25
1997-07-01	Qtr3	Sussex	Inland Bays	Indian River	306181	26
1997-07-01	Qtr3	Sussex	Chesapeake Bay	Broad Creek	307171	29
1997-07-01	Qtr3	Sussex	Inland Bays	Rehoboth Bay	308031	27
1997-07-01	Qtr3	Sussex	Inland Bays	Indian River	308281	23
1997-07-01	Qtr3	Sussex	Inland Bays	Iron Branch	309041	19
1997-07-01	Qtr3	Sussex	Inland Bays	Little Assawoman Bay	310011	27
1997-07-01	Qtr3	Sussex	Inland Bays	Buntings Branch	311041	22.5
1997-07-01	Qtr3	Sussex	Chesapeake Bay	Gravelly Branch	316011	19
1997-10-01	Qtr4	Sussex	Delaware Bay	Cedar Creek	301021	11
1997-10-01	Qtr4	Sussex	Delaware Bay	Cedar Creek	301031	11
1997-10-01	Qtr4	Sussex	Delaware Bay	Cedar Creek	301091	11
1997-10-01	Qtr4	Sussex	Delaware Bay	Broadkill River	303021	13.05
1997-10-01	Qtr4	Sussex	Delaware Bay	Broadkill River	303331	16
1997-10-01	Qtr4	Sussex	Chesapeake Bay	Nanticoke River	304191	13
1997-10-01	Qtr4	Sussex	Chesapeake Bay	Nanticoke River	304311	10.4
1997-10-01	Qtr4	Sussex	Chesapeake Bay	Nanticoke River	304321	10.05
1997-10-01	Qtr4	Sussex	Chesapeake Bay	Nanticoke River	304471	14
1997-10-01	Qtr4	Sussex	Inland Bays	Lewes-Rehoboth Canal	305011	13
1997-10-01	Qtr4	Sussex	Inland Bays	Lewes-Rehoboth Canal	305041	12
1997-10-01	Qtr4	Sussex	Inland Bays	Rehoboth Bay	306091	13
1997-10-01	Qtr4	Sussex	Inland Bays	Indian River Bay	306111	13
1997-10-01	Qtr4	Sussex	Inland Bays	Indian River Bay	306121	14
1997-10-01	Qtr4	Sussex	Inland Bays	Indian River	306181	14
1997-10-01	Qtr4	Sussex	Inland Bays	Indian River	306341	19
1997-10-01	Qtr4	Sussex	Chesapeake Bay	Broad Creek	307171	14
1997-10-01	Qtr4	Sussex	Inland Bays	Rehoboth Bay	308031	13
1997-10-01	Qtr4	Sussex	Inland Bays	Indian River	308281	13
1997-10-01	Qtr4	Sussex	Inland Bays	Iron Branch	309041	12
1997-10-01	Qtr4	Sussex	Inland Bays	Little Assawoman Bay	310011	14
1997-10-01	Qtr4	Sussex	Inland Bays	Buntings Branch	311041	17
1997-10-01	Qtr4	Sussex	Chesapeake Bay	Gravelly Branch	316011	10.1
1998-01-01	Qtr1	Kent	Delaware Bay	Murderkill River	206101	8.5
1998-01-01	Qtr1	Kent	Delaware Bay	Murderkill River	206361	9
1998-01-01	Qtr1	Kent	Delaware Bay	Murderkill River	206451	9
1998-01-01	Qtr1	Kent	Delaware Bay	Murderkill River	206561	8.5
1998-01-01	Qtr1	Sussex	Inland Bays	Rehoboth Bay	308031	21.9
1998-01-01	Qtr1	Sussex	Inland Bays	Indian River	308281	19.9
1998-01-01	Qtr1	Sussex	Inland Bays	Iron Branch	309041	18.1
1998-01-01	Qtr1	Sussex	Inland Bays	Little Assawoman Bay	310011	18.1
1998-01-01	Qtr1	Sussex	Chesapeake Bay	Nanticoke River	304311	10.85
1998-01-01	Qtr1	Sussex	Chesapeake Bay	Nanticoke River	304321	9.45
1998-01-01	Qtr1	Sussex	Chesapeake Bay	Nanticoke River	304471	12
1998-01-01	Qtr1	Sussex	Chesapeake Bay	Broad Creek	307171	12
1998-01-01	Qtr1	Sussex	Chesapeake Bay	Gravelly Branch	316011	10.7
1998-04-01	Qtr2	Kent	Chesapeake Bay	Chester River	112021	19
1998-04-01	Qtr2	Kent	Delaware Bay	Murderkill River	206101	21
1998-04-01	Qtr2	Kent	Delaware Bay	Murderkill River	206141	22
1998-04-01	Qtr2	Kent	Delaware Bay	Murderkill River	206231	22
1998-04-01	Qtr2	Kent	Delaware Bay	Murderkill River	206361	21
1998-04-01	Qtr2	Kent	Delaware Bay	Murderkill River	206451	23
1998-04-01	Qtr2	Kent	Delaware Bay	Murderkill River	206561	19
1998-04-01	Qtr2	Sussex	Inland Bays	Lewes-Rehoboth Canal	305011	19.55
1998-04-01	Qtr2	Sussex	Inland Bays	Lewes-Rehoboth Canal	305041	16.8333
1998-04-01	Qtr2	Sussex	Inland Bays	Rehoboth Bay	306091	18.2
1998-04-01	Qtr2	Sussex	Inland Bays	Indian River Bay	306111	13.85
1998-04-01	Qtr2	Sussex	Inland Bays	Indian River Bay	306121	16.1
1998-04-01	Qtr2	Sussex	Inland Bays	Indian River	306181	20.4
1998-04-01	Qtr2	Sussex	Inland Bays	Indian River	306331	23.8
1998-04-01	Qtr2	Sussex	Inland Bays	Indian River	306341	24.9
1998-04-01	Qtr2	Sussex	Inland Bays	Rehoboth Bay	308031	20
1998-04-01	Qtr2	Sussex	Inland Bays	Indian River	308281	20
1998-04-01	Qtr2	Sussex	Inland Bays	Iron Branch	309041	17
1998-04-01	Qtr2	Sussex	Inland Bays	Little Assawoman Bay	310011	20
1998-04-01	Qtr2	Sussex	Inland Bays	Buntings Branch	311041	12
1998-04-01	Qtr2	Sussex	Delaware Bay	Cedar Creek	301021	16
1998-04-01	Qtr2	Sussex	Delaware Bay	Cedar Creek	301031	15
1998-04-01	Qtr2	Sussex	Delaware Bay	Cedar Creek	301091	14
1998-04-01	Qtr2	Sussex	Chesapeake Bay	Marshyhope Creek	302031	17
1998-04-01	Qtr2	Sussex	Delaware Bay	Broadkill River	303021	14
1998-04-01	Qtr2	Sussex	Delaware Bay	Broadkill River	303331	15
1998-04-01	Qtr2	Sussex	Chesapeake Bay	Nanticoke River	304191	20
1998-04-01	Qtr2	Sussex	Chesapeake Bay	Nanticoke River	304311	22
1998-04-01	Qtr2	Sussex	Chesapeake Bay	Nanticoke River	304321	23
1998-04-01	Qtr2	Sussex	Chesapeake Bay	Nanticoke River	304471	23
1998-04-01	Qtr2	Sussex	Chesapeake Bay	Broad Creek	307171	23
1998-04-01	Qtr2	Sussex	Chesapeake Bay	Gravelly Branch	316011	19
1998-07-01	Qtr3	Kent	Chesapeake Bay	Chester River	112021	22.2
1998-07-01	Qtr3	Kent	Delaware Bay	Murderkill River	206101	22.5
1998-07-01	Qtr3	Kent	Delaware Bay	Murderkill River	206141	22.9
1998-07-01	Qtr3	Kent	Delaware Bay	Murderkill River	206231	23.5
1998-07-01	Qtr3	Kent	Delaware Bay	Murderkill River	206361	24.5
1998-07-01	Qtr3	Kent	Delaware Bay	Murderkill River	206451	25.1
1998-07-01	Qtr3	Kent	Delaware Bay	Murderkill River	206561	22.4
1998-07-01	Qtr3	Sussex	Inland Bays	Lewes-Rehoboth Canal	305011	24.9
1998-07-01	Qtr3	Sussex	Inland Bays	Lewes-Rehoboth Canal	305041	23.5
1998-07-01	Qtr3	Sussex	Inland Bays	Rehoboth Bay	306091	24.5
1998-07-01	Qtr3	Sussex	Inland Bays	Indian River Bay	306111	23.1
1998-07-01	Qtr3	Sussex	Inland Bays	Indian River Bay	306121	23
1998-07-01	Qtr3	Sussex	Inland Bays	Indian River	306181	27.4
1998-07-01	Qtr3	Sussex	Inland Bays	Indian River	306331	29.6
1998-07-01	Qtr3	Sussex	Inland Bays	Indian River	306341	30.6
1998-07-01	Qtr3	Sussex	Inland Bays	Rehoboth Bay	308031	25.3
1998-07-01	Qtr3	Sussex	Inland Bays	Indian River	308281	16.5
1998-07-01	Qtr3	Sussex	Inland Bays	Iron Branch	309041	20.2
1998-07-01	Qtr3	Sussex	Inland Bays	Little Assawoman Bay	310011	25.4
1998-07-01	Qtr3	Sussex	Inland Bays	Buntings Branch	311041	16.4
1998-07-01	Qtr3	Sussex	Delaware Bay	Cedar Creek	301021	25.9
1998-07-01	Qtr3	Sussex	Delaware Bay	Cedar Creek	301031	23.9667
1998-07-01	Qtr3	Sussex	Delaware Bay	Cedar Creek	301091	23.5333
1998-07-01	Qtr3	Sussex	Chesapeake Bay	Marshyhope Creek	302031	24.4
1998-07-01	Qtr3	Sussex	Delaware Bay	Broadkill River	303021	22.25
1998-07-01	Qtr3	Sussex	Delaware Bay	Broadkill River	303331	26.4667
1998-07-01	Qtr3	Sussex	Chesapeake Bay	Nanticoke River	304191	20.4
1998-07-01	Qtr3	Sussex	Chesapeake Bay	Nanticoke River	304471	25.2
1998-07-01	Qtr3	Sussex	Chesapeake Bay	Broad Creek	307171	27.4
1998-10-01	Qtr4	Kent	Chesapeake Bay	Chester River	112021	13.6
1998-10-01	Qtr4	Sussex	Inland Bays	Little Assawoman Bay	310011	10.6
1998-10-01	Qtr4	Sussex	Inland Bays	Buntings Branch	311041	14.4
1998-10-01	Qtr4	Sussex	Delaware Bay	Cedar Creek	301021	10.5
1998-10-01	Qtr4	Sussex	Delaware Bay	Cedar Creek	301031	9.5
1998-10-01	Qtr4	Sussex	Delaware Bay	Cedar Creek	301091	9.6
1998-10-01	Qtr4	Sussex	Chesapeake Bay	Marshyhope Creek	302031	13.9
1998-10-01	Qtr4	Sussex	Delaware Bay	Broadkill River	303021	7.6
1998-10-01	Qtr4	Sussex	Delaware Bay	Broadkill River	303331	10.9
1998-10-01	Qtr4	Sussex	Chesapeake Bay	Nanticoke River	304191	13.4
1998-10-01	Qtr4	Sussex	Chesapeake Bay	Nanticoke River	304311	15.6
1998-10-01	Qtr4	Sussex	Chesapeake Bay	Nanticoke River	304321	16.5
1998-10-01	Qtr4	Sussex	Chesapeake Bay	Nanticoke River	304471	14.2
1998-10-01	Qtr4	Sussex	Inland Bays	Lewes-Rehoboth Canal	305011	8.5
1998-10-01	Qtr4	Sussex	Inland Bays	Lewes-Rehoboth Canal	305041	9.3
1998-10-01	Qtr4	Sussex	Inland Bays	Rehoboth Bay	306091	9.4
1998-10-01	Qtr4	Sussex	Inland Bays	Indian River Bay	306111	11.9
1998-10-01	Qtr4	Sussex	Inland Bays	Indian River Bay	306121	11.6
1998-10-01	Qtr4	Sussex	Inland Bays	Indian River	306181	10.5
1998-10-01	Qtr4	Sussex	Inland Bays	Indian River	306331	12.7
1998-10-01	Qtr4	Sussex	Inland Bays	Indian River	306341	15.3
1998-10-01	Qtr4	Sussex	Chesapeake Bay	Broad Creek	307171	16.1
1998-10-01	Qtr4	Sussex	Inland Bays	Rehoboth Bay	308031	12.1
1998-10-01	Qtr4	Sussex	Inland Bays	Indian River	308281	12.1
1998-10-01	Qtr4	Sussex	Inland Bays	Iron Branch	309041	10
1998-10-01	Qtr4	Sussex	Chesapeake Bay	Gravelly Branch	316011	12.1
1999-01-01	Qtr1	Sussex	Chesapeake Bay	Nanticoke River	304191	6.2
1999-01-01	Qtr1	Sussex	Chesapeake Bay	Nanticoke River	304311	4
1999-01-01	Qtr1	Sussex	Chesapeake Bay	Nanticoke River	304321	5.8
1999-01-01	Qtr1	Sussex	Chesapeake Bay	Nanticoke River	304471	3.6
1999-01-01	Qtr1	Sussex	Chesapeake Bay	Broad Creek	307171	4.8
1999-01-01	Qtr1	Sussex	Chesapeake Bay	Gravelly Branch	316011	5
1999-01-01	Qtr1	New Castle	Piedmont	Red Clay Creek	103011	4.3
1999-01-01	Qtr1	New Castle	Piedmont	Red Clay Creek	103031	3.76667
1999-01-01	Qtr1	New Castle	Piedmont	White Clay Creek	105031	4.45
1999-01-01	Qtr1	New Castle	Piedmont	White Clay Creek	105151	5.95
1999-01-01	Qtr1	New Castle	Piedmont	Christina River	106021	5
1999-01-01	Qtr1	New Castle	Piedmont	Christina River	106291	4.2
1999-04-01	Qtr2	Kent	Chesapeake Bay	Chester River	112021	20.6
1999-04-01	Qtr2	Kent	Delaware Bay	Smyrna River	201021	13.1
1999-04-01	Qtr2	Kent	Delaware Bay	Smyrna River	201051	14.8
1999-04-01	Qtr2	Kent	Delaware Bay	Leipsic River	202021	26.6
1999-04-01	Qtr2	Kent	Delaware Bay	Leipsic River	202031	24.5
1999-04-01	Qtr2	Kent	Delaware Bay	Little River	204031	11.7
1999-04-01	Qtr2	Kent	Delaware Bay	Murderkill River	206101	16.1
1999-04-01	Qtr2	Kent	Delaware Bay	Murderkill River	206141	15.85
1999-04-01	Qtr2	Kent	Delaware Bay	Murderkill River	206231	17.6667
1999-04-01	Qtr2	Kent	Delaware Bay	Murderkill River	206361	17.05
1999-04-01	Qtr2	Kent	Delaware Bay	Murderkill River	206451	17.45
1999-04-01	Qtr2	Kent	Delaware Bay	Murderkill River	206561	13.8
1999-04-01	Qtr2	Kent	Chesapeake Bay	Choptank River	207021	17.5
1999-04-01	Qtr2	Kent	Delaware Bay	Missipillion River	208021	22.6
1999-04-01	Qtr2	Kent	Delaware Bay	Missipillion River	208211	23.1
1999-04-01	Qtr2	Kent	Delaware Bay	Missipillion River	208231	18.9
1999-04-01	Qtr2	Sussex	Delaware Bay	Cedar Creek	301021	13.8
1999-04-01	Qtr2	Sussex	Delaware Bay	Cedar Creek	301031	13
1999-04-01	Qtr2	Sussex	Delaware Bay	Cedar Creek	301091	11.2
1999-04-01	Qtr2	Sussex	Chesapeake Bay	Marshyhope Creek	302031	15.9
1999-04-01	Qtr2	Sussex	Delaware Bay	Broadkill River	303021	13.9
1999-04-01	Qtr2	Sussex	Delaware Bay	Broadkill River	303331	14.1
1999-04-01	Qtr2	Sussex	Chesapeake Bay	Nanticoke River	304191	24.2
1999-04-01	Qtr2	Sussex	Chesapeake Bay	Nanticoke River	304311	27.4
1999-04-01	Qtr2	Sussex	Chesapeake Bay	Nanticoke River	304321	28.5
1999-04-01	Qtr2	Sussex	Chesapeake Bay	Nanticoke River	304471	27
1999-04-01	Qtr2	Sussex	Inland Bays	Lewes-Rehoboth Canal	305011	18.25
1999-04-01	Qtr2	Sussex	Inland Bays	Lewes-Rehoboth Canal	305041	16.7
1999-04-01	Qtr2	Sussex	Inland Bays	Rehoboth Bay	306091	16.6
1999-04-01	Qtr2	Sussex	Inland Bays	Indian River Bay	306111	16.1
1999-04-01	Qtr2	Sussex	Inland Bays	Indian River Bay	306121	15.1333
1999-04-01	Qtr2	Sussex	Inland Bays	Indian River	306181	19.4
1999-04-01	Qtr2	Sussex	Inland Bays	Indian River	306331	20.6
1999-04-01	Qtr2	Sussex	Inland Bays	Indian River	306341	22.55
1999-04-01	Qtr2	Sussex	Chesapeake Bay	Broad Creek	307171	27.7
1999-04-01	Qtr2	Sussex	Inland Bays	Rehoboth Bay	308031	20.5
1999-04-01	Qtr2	Sussex	Inland Bays	Indian River	308281	19.65
1999-04-01	Qtr2	Sussex	Inland Bays	Indian River bay	308361	18.1
1999-04-01	Qtr2	Sussex	Inland Bays	Rehoboth Bay	308371	12.5
1999-04-01	Qtr2	Sussex	Inland Bays	Iron Branch	309041	14.7
1999-04-01	Qtr2	Sussex	Inland Bays	Little Assawoman Bay	310011	17.95
1999-04-01	Qtr2	Sussex	Chesapeake Bay	Gravelly Branch	316011	24
1999-04-01	Qtr2	New Castle	Piedmont	Shellpot Creek	102041	13.5
1999-04-01	Qtr2	New Castle	Piedmont	Red Clay Creek	103011	19
1999-04-01	Qtr2	New Castle	Piedmont	Red Clay Creek	103031	17.3
1999-04-01	Qtr2	New Castle	Piedmont	White Clay Creek	105031	19
1999-04-01	Qtr2	New Castle	Piedmont	White Clay Creek	105151	17.5
1999-04-01	Qtr2	New Castle	Piedmont	Christina River	106021	19.8
1999-04-01	Qtr2	New Castle	Piedmont	Christina River	106291	18.9
1999-04-01	Qtr2	New Castle	Delaware Bay	Red Lion Creek	107011	11.5
1999-04-01	Qtr2	New Castle	Delaware Bay	Red Lion Creek	107031	16.7
1999-04-01	Qtr2	New Castle	Chesapeake Bay	Chesapeake and Delaware Canal	108021	14.5
1999-04-01	Qtr2	New Castle	Chesapeake Bay	Chesapeake and Delaware Canal	108111	14.7
1999-04-01	Qtr2	New Castle	Delaware Bay	Appoquinimink River	109041	16.7667
1999-04-01	Qtr2	New Castle	Delaware Bay	Appoquinimink River	109071	21.9333
1999-04-01	Qtr2	New Castle	Delaware Bay	Appoquinimink River	109091	18.3
1999-04-01	Qtr2	New Castle	Delaware Bay	Appoquinimink River	109121	18.8
1999-04-01	Qtr2	New Castle	Delaware Bay	Appoquinimink River	109131	20.55
1999-04-01	Qtr2	New Castle	Delaware Bay	Appoquinimink River	109171	19.55
1999-04-01	Qtr2	New Castle	Delaware Bay	Appoquinimink River	109191	19.95
1999-04-01	Qtr2	New Castle	Delaware Bay	Blackbird Creek	110041	15.1
1999-04-01	Qtr2	New Castle	Delaware Bay	Dragon Creek	111011	16
1999-04-01	Qtr2	New Castle	Delaware Bay	Dragon Creek	111031	12.9
1999-04-01	Qtr2	New Castle	Delaware Bay	Army Creek	114011	16.6
1999-04-01	Qtr2	New Castle	Delaware Bay	Smyrna River	201041	14.6
1999-04-01	Qtr2	New Castle	Delaware Bay	Smyrna River	201161	15.4
1999-07-01	Qtr3	Kent	Chesapeake Bay	Chester River	112021	23.1
1999-07-01	Qtr3	Kent	Delaware Bay	Smyrna River	201021	28.8
1999-07-01	Qtr3	Kent	Delaware Bay	Smyrna River	201051	27.6
1999-07-01	Qtr3	Kent	Delaware Bay	Leipsic River	202021	26.2
1999-07-01	Qtr3	Kent	Delaware Bay	Leipsic River	202031	24.8
1999-07-01	Qtr3	Kent	Delaware Bay	Little River	204031	19.1
1999-07-01	Qtr3	Kent	Delaware Bay	Murderkill River	206101	25.45
1999-07-01	Qtr3	Kent	Delaware Bay	Murderkill River	206141	25.8
1999-07-01	Qtr3	Kent	Delaware Bay	Murderkill River	206231	25.6
1999-07-01	Qtr3	Kent	Delaware Bay	Murderkill River	206361	26.35
1999-07-01	Qtr3	Kent	Delaware Bay	Murderkill River	206451	26.95
1999-07-01	Qtr3	Kent	Delaware Bay	Murderkill River	206561	22.6333
1999-07-01	Qtr3	Kent	Chesapeake Bay	Choptank River	207021	23.3
1999-07-01	Qtr3	Kent	Delaware Bay	Missipillion River	208021	24.3
1999-07-01	Qtr3	Kent	Delaware Bay	Missipillion River	208211	24.5
1999-07-01	Qtr3	Kent	Delaware Bay	Missipillion River	208231	16.8
1999-07-01	Qtr3	Sussex	Delaware Bay	Cedar Creek	301021	21.1
1999-07-01	Qtr3	Sussex	Delaware Bay	Cedar Creek	301031	20.8
1999-07-01	Qtr3	Sussex	Delaware Bay	Cedar Creek	301091	20.6
1999-07-01	Qtr3	Sussex	Chesapeake Bay	Marshyhope Creek	302031	24.1
1999-07-01	Qtr3	Sussex	Delaware Bay	Broadkill River	303021	20.8
1999-07-01	Qtr3	Sussex	Delaware Bay	Broadkill River	303331	27.1
1999-07-01	Qtr3	Sussex	Chesapeake Bay	Nanticoke River	304191	24.3
1999-07-01	Qtr3	Sussex	Chesapeake Bay	Nanticoke River	304311	29.5
1999-07-01	Qtr3	Sussex	Chesapeake Bay	Nanticoke River	304321	29.6
1999-07-01	Qtr3	Sussex	Chesapeake Bay	Nanticoke River	304471	28.6
1999-07-01	Qtr3	Sussex	Inland Bays	Lewes-Rehoboth Canal	305011	24.9
1999-07-01	Qtr3	Sussex	Inland Bays	Lewes-Rehoboth Canal	305041	23.8
1999-07-01	Qtr3	Sussex	Inland Bays	Rehoboth Bay	306091	23.6
1999-07-01	Qtr3	Sussex	Inland Bays	Indian River Bay	306111	23.6
1999-07-01	Qtr3	Sussex	Inland Bays	Indian River Bay	306121	23.6
1999-07-01	Qtr3	Sussex	Inland Bays	Indian River	306181	26.8
1999-07-01	Qtr3	Sussex	Inland Bays	Indian River	306331	27.1
1999-07-01	Qtr3	Sussex	Inland Bays	Indian River	306341	30.6
1999-07-01	Qtr3	Sussex	Chesapeake Bay	Broad Creek	307171	28.5
1999-07-01	Qtr3	Sussex	Inland Bays	Rehoboth Bay	308031	27.9
1999-07-01	Qtr3	Sussex	Inland Bays	Indian River	308281	23.7
1999-07-01	Qtr3	Sussex	Inland Bays	Indian River bay	308361	19.6
1999-07-01	Qtr3	Sussex	Inland Bays	Iron Branch	309041	19.7
1999-07-01	Qtr3	Sussex	Inland Bays	Little Assawoman Bay	310011	26.5
1999-07-01	Qtr3	Sussex	Chesapeake Bay	Gravelly Branch	316011	20.3
1999-07-01	Qtr3	New Castle	Piedmont	Shellpot Creek	102041	29.7
1999-07-01	Qtr3	New Castle	Piedmont	Red Clay Creek	103011	22
1999-07-01	Qtr3	New Castle	Piedmont	Red Clay Creek	103031	22
1999-07-01	Qtr3	New Castle	Piedmont	White Clay Creek	105031	20.85
1999-07-01	Qtr3	New Castle	Piedmont	White Clay Creek	105151	22.5
1999-07-01	Qtr3	New Castle	Piedmont	Christina River	106021	26.8
1999-07-01	Qtr3	New Castle	Piedmont	Christina River	106291	26.9
1999-07-01	Qtr3	New Castle	Delaware Bay	Red Lion Creek	107011	22.6
1999-07-01	Qtr3	New Castle	Delaware Bay	Red Lion Creek	107031	24.9
1999-07-01	Qtr3	New Castle	Chesapeake Bay	Chesapeake and Delaware Canal	108021	27.6
1999-07-01	Qtr3	New Castle	Chesapeake Bay	Chesapeake and Delaware Canal	108111	27.3
1999-07-01	Qtr3	New Castle	Delaware Bay	Appoquinimink River	109041	27.4
1999-07-01	Qtr3	New Castle	Delaware Bay	Appoquinimink River	109071	27.3
1999-07-01	Qtr3	New Castle	Delaware Bay	Appoquinimink River	109091	27.7
1999-07-01	Qtr3	New Castle	Delaware Bay	Appoquinimink River	109121	27.5
1999-07-01	Qtr3	New Castle	Delaware Bay	Appoquinimink River	109131	28.6
[truncated: 5,044 more rows]
