# Supplementary material
Source: MDPI journal article supplement (https://www.mdpi.com/2306-5729/6/8/79)
Supplement: s1 [file s1 › Table S2 Summary Stat_v1.xlsx]

## Sheet: SummaryTable
Site	Quarter	Watershed	Latitude	Longitude	Overall_Change	Temp_Changes	R-square	Coefficient of Variation	Model p value
105151	1	White Clay Creek	39.6989	-75.6755	-	=-0.00036x+10.99	0.28	32	0.02
107011	3	Red Lion Creek	39.6054	-75.6649	+	=0.00017x+19.06	0.23	8.4	0.004
107011	4	Red Lion Creek	39.6054	-75.6649	+	=0.00029x+6.30	0.23	30.5	0.004
107031	3	Red Lion Creek	39.6054	-75.63	+	=0.00014x+22.5	0.12	9	0.04
107031	4	Red Lion Creek	39.6054	-75.63	+	=0.00028x+6.5	0.14	40.5	0.03
108021	3	C&D Canal	39.5537	-75.6509	+	=0.00013x+24.51	0.22	5.8	0.004
108021	4	C&D Canal	39.5537	-75.6509	+	=0.00021x+11	0.11	27.2	0.04
109041	1	Appoquinimink River	39.4442	-75.6633	-	=0.00018x+7.8	0.17	48.3	0.03
109091	3	Appoquinimink River	39.4491	-75.5789	+	=0.00027x+20.9	0.25	4.2	0.01
109121	1	Appoquinimink River	39.465	-75.6113	-	=-0.00056x+14.4	0.27	48.3	0.02
109131	1	Appoquinimink River	39.4345	-75.683	-	=-0.00065x+17.74	0.3	36.3	0.01
109171	1	Appoquinimink River	39.4562	-75.648	-	=-0.00070x+17.37	0.3	52.3	0.02
109171	3	Appoquinimink River	39.4562	-75.648	+	=0.00032x+20.12	0.26	4.9	0.01
109191	1	Appoquinimink River	39.4833	-75.6712	-	=-0.00051x+14.9	0.24	36	0.04
109191	3	Appoquinimink River	39.4833	-75.6712	+	=0.00029x+20.7	0.23	4.8	0.03
111011	1	Dragon Run Creek	39.5772	-75.602	-	=-0.00091x+21.4	0.3	62	0.02
111011	3	Dragon Run Creek	39.5772	-75.602	+	=0.00039x+17.9	0.23	6.65	0.02
111031	3	Dragon Run Creek	39.5694	-75.6547	+	=0.00027x+18.1	0.29	12.12	0.001
111031	4	Dragon Run Creek	39.5694	-75.6547	+	=0.00035x+5.0	0.3	32	0.0006
307031	2	Broad Creek	38.5688	-75.6191	+	=0.00025x+16.26	0.21	16.2	0.01
303021	1	Broadkill River	38.7426	-75.3299	+	=0.00016x+5	0.17	30.5	0.04
303021	4	Broadkill River	38.7426	-75.3299	+	=0.00027x+6.46	0.17	30.8	0.02
303061	2	Broadkill River	38.7905	-75.1635	+	=0.00019x+14.37	0.16	17	0.04
303061	3	Broadkill River	38.7905	-75.1635	+	=0.00017x+21.3	0.29	7.8	0.003
303331	3	Broadkill River	38.8241	-75.3087	+	=0.00021x+22.6	0.22	5.6	0.01
301021	3	Cedar Creek	38.869	-75.3774	+	=0.00032x+20.64	0.28	9.4	0.0009
301031	3	Cedar Creek	38.878	-75.3593	+	=0.00037x+18.23	0.47	7.3	<.0001
301091	3	Cedar Creek	38.9351	-75.3237	+	=0.00032x+18.84	0.21	7.13	0.01
306331	2	Indian River	38.5877	-75.2045	-	=-0.00039x+28.85	0.14	14	0.03
306331	3	Indian River	38.5877	-75.2045	-	=-0.00042x+34.9	0.2	10.1	0.01
306331	4	Indian River	38.5877	-75.2045	-	=-0.00105x+31.6	0.54	22.8	<.0001
306341	1	Indian River	38.5834	-75.2245	-	=-0.00148x+39.09	0.61	21.5	0.0002
306341	3	Indian River	38.5834	-75.2245	-	=-0.00082x+42.99	0.26	12.2	0.01
306341	4	Indian River	38.5834	-75.2245	-	=-0.00154x+41.87	0.59	23	0.0003
308281	4	Indian River	38.6386	-75.3159	-	=-0.00056x+21.45	0.39	16.7	0.005
306111	3	Indian River Bay	38.6256	-75.0998	+	=0.00010x+22.11	0.11	6.7	0.01
308361	3	Indian River Bay	38.5456	-75.1635	+	=0.00054x+11.83	0.28	9.3	0.01
202021	3	Leipsic River	39.2439	-75.5882	+	=0.00036x+19.04	0.21	6.5	0.03
208231	3	Mispillion River	38.9057	-75.5127	+	=0.00037x+11.85	0.35	6.3	0.004
206101	1	Murderkill River	39.0585	-75.3967	-	=-0.00053x+14.59	0.2	50.6	0.04
206101	3	Murderkill River	39.0585	-75.3967	+	=0.00036x+18.28	0.33	5.1	0.005
206141	3	Murderkill River	39.0298	-75.4104	+	=0.00036x+18.95	0.3	5.25	0.008
206231	3	Murderkill River	39.0099	-75.4398	+	=0.00036x+18.74	0.29	5.45	0.009
206361	1	Murderkill River	38.9674	-75.4932	-	=0.00048x+15.65	0.21	30.7	0.04
206451	3	Murderkill River	39.989	-75.5107	+	=0.00030x+20.84	0.18	5.9	0.04
206561	1	Murderkill River	39.0345	-75.4835	-	=-0.00053x+15.4	0.26	36.6	0.03
206561	3	Murderkill River	39.0345	-75.4835	+	=0.00036x+17.04	0.18	7.9	0.04
304191	4	Nanticoke River	38.7285	-75.5621	-	=-0.00024x+16.08	0.15	18.1	0.04
304471	4	Nanticoke River	38.6433	-75.5934	-	=-0.00052x+21.6	0.4	16.5	0.001
308031	2	Rehoboth Bay	38.6717	-75.1859	+	=0.00036x+14.5	0.2	16.3	0.006
